# Supplementary material for: AMBIsome Therapy Induction OptimisatioN (AMBITION): High dose AmBisome for cryptococcal meningitis induction therapy in sub-Saharan Africa: economic evaluation protocol for a randomised controlled trial-based equivalence study
Source: PubMed Central journal article supplement (PMC6500286; doi:10.1136/bmjopen-2018-026288), 2019-04-01
Supplement: bmjopen-2018-026288.draft_revisions.pdf [file bmjopen-2018-026288.draft_revisions.pdf]

# BMJ Open

BMJ Open is committed to open peer review. As part of this commitment we make the peer review history of every article we publish publicly available.

When an article is published we post the peer reviewers' comments and the authors' responses online. We also post the versions of the paper that were used during peer review. These are the versions that the peer review comments apply to.

The versions of the paper that follow are the versions that were submitted during the peer review process. They are not the versions of record or the final published versions. They should not be cited or distributed as the published version of this manuscript.

BMJ Open is an open access journal and the full, final, typeset and author-corrected version of record of the manuscript is available on our site with no access controls, subscription charges or pay-per-view fees (<http://bmjopen.bmj.com>).

If you have any questions on BMJ Open's open peer review process please email [info.bmjopen@bmj.com](mailto:info.bmjopen@bmj.com)

# BMJ Open

**AMBisome Therapy Induction Optimisation (AMBITION):  
High dose Ambisome for Cryptococcal Meningitis Induction  
Therapy in sub-Saharan Africa: Economic Evaluation  
Protocol for a Randomised Controlled Trial Based  
Equivalence Study**

|                               |                                                                                                                                                                                                                                                                                                                                                                                                                                                                                                                                                                                                                                                                                                                                                                                                                                                                                                                                                                                                                                                                                                                                                                                                                                                                                                                                                                                                                                                                                                                                                                                                                                                                                                                                                                                                                                                                                                                                                                                                                                                                                                                                                                                                                                                                                                                                                 |
|-------------------------------|-------------------------------------------------------------------------------------------------------------------------------------------------------------------------------------------------------------------------------------------------------------------------------------------------------------------------------------------------------------------------------------------------------------------------------------------------------------------------------------------------------------------------------------------------------------------------------------------------------------------------------------------------------------------------------------------------------------------------------------------------------------------------------------------------------------------------------------------------------------------------------------------------------------------------------------------------------------------------------------------------------------------------------------------------------------------------------------------------------------------------------------------------------------------------------------------------------------------------------------------------------------------------------------------------------------------------------------------------------------------------------------------------------------------------------------------------------------------------------------------------------------------------------------------------------------------------------------------------------------------------------------------------------------------------------------------------------------------------------------------------------------------------------------------------------------------------------------------------------------------------------------------------------------------------------------------------------------------------------------------------------------------------------------------------------------------------------------------------------------------------------------------------------------------------------------------------------------------------------------------------------------------------------------------------------------------------------------------------|
| Journal:                      | <i>BMJ Open</i>                                                                                                                                                                                                                                                                                                                                                                                                                                                                                                                                                                                                                                                                                                                                                                                                                                                                                                                                                                                                                                                                                                                                                                                                                                                                                                                                                                                                                                                                                                                                                                                                                                                                                                                                                                                                                                                                                                                                                                                                                                                                                                                                                                                                                                                                                                                                 |
| Manuscript ID                 | bmjopen-2018-026288                                                                                                                                                                                                                                                                                                                                                                                                                                                                                                                                                                                                                                                                                                                                                                                                                                                                                                                                                                                                                                                                                                                                                                                                                                                                                                                                                                                                                                                                                                                                                                                                                                                                                                                                                                                                                                                                                                                                                                                                                                                                                                                                                                                                                                                                                                                             |
| Article Type:                 | Protocol                                                                                                                                                                                                                                                                                                                                                                                                                                                                                                                                                                                                                                                                                                                                                                                                                                                                                                                                                                                                                                                                                                                                                                                                                                                                                                                                                                                                                                                                                                                                                                                                                                                                                                                                                                                                                                                                                                                                                                                                                                                                                                                                                                                                                                                                                                                                        |
| Date Submitted by the Author: | 24-Aug-2018                                                                                                                                                                                                                                                                                                                                                                                                                                                                                                                                                                                                                                                                                                                                                                                                                                                                                                                                                                                                                                                                                                                                                                                                                                                                                                                                                                                                                                                                                                                                                                                                                                                                                                                                                                                                                                                                                                                                                                                                                                                                                                                                                                                                                                                                                                                                     |
| Complete List of Authors:     | <p>Ponatshego, Ponego; Botswana-Harvard AIDS Institute Partnership, Clinical Trials Unit<br/>         Lawrence, David; Botswana-Harvard AIDS Institute Partnership, Clinical Trials Unit; London School of Hygiene and Tropical Medicine Department of Clinical Research<br/>         Youssof, Nabila; London School of Hygiene and Tropical Medicine, EPH; Botswana-Harvard AIDS Institute Partnership<br/>         Molloy, Sile; St. George's University of London<br/>         Alufandika, melanie; Malawi-Liverpool-Wellcome Trust Clinical Research Centre<br/>         Bango, Funeka; Institute of Infectious Diseases and Molecular Medicine Boulware, David R.; Univ Minnesota<br/>         Chawinga, Chimwemwe; Lilongwe Medical Relief Trust (UNC Project)<br/>         Dziwani, Eltas; Malawi-Liverpool-Wellcome Trust Clinical Research Centre<br/>         Gondwe, Ebbie; Malawi-Liverpool-Wellcome Trust Clinical Research Centre<br/>         Hlupeni, Admire; University of Zimbabwe College of Health Sciences<br/>         Hosseinipour, Mina C.; Kamuzu Cent Hosp<br/>         Kanyama, Cecilia; Lilongwe Medical Relief Trust (UNC) Project<br/>         Meya, David; Makerere University<br/>         Mosepele, Mosepele; Botswana-Harvard AIDS Institute Partnership<br/>         Muthoga, Charles; Botswana-Harvard AIDS Institute Partnership<br/>         Muzoora, Conrad; Makerere University<br/>         Mwandumba, Henry; Liverpool School of Tropical Medicine; Malawi Liverpool Wellcome Trust Clinical Research Programme<br/>         Ndhlovu, Chiratidzo; University of Zimbabwe College of Health Sciences<br/>         Rajasingham, Radha; University of Minnesota<br/>         sayed, sumaya; Institute of Infectious Diseases and Molecular Medicine<br/>         Shamu, Shepherd; University of Zimbabwe College of Health Sciences<br/>         Tsholo, Katlego; Botswana-Harvard AIDS Institute Partnership<br/>         Tugume, Lillian ; Makerere University<br/>         Williams, Darlisha; Makerere University<br/>         Maheswaran, Hendramoorthy; University of Warwick Warwick Medical School<br/>         Shiri, Tinevimbo; Liverpool School of Tropical Medicine<br/>         BOYER-CHAMMARD, Timothée; Institut Pasteur<br/>         Loyse, Angela; St George's University of London</p> |

1  
2  
3  
4  
5  
6  
7  
8  
9  
10  
11  
12  
13  
14  
15  
16  
17  
18  
19  
20  
21  
22  
23  
24  
25  
26  
27  
28  
29  
30  
31  
32  
33  
34  
35  
36  
37  
38  
39  
40  
41  
42  
43  
44  
45  
46  
47  
48  
49  
50  
51  
52  
53  
54  
55  
56  
57  
58  
59  
60

|                  |                                                                                                                                                                                                                                                                                                                                                                                                                                                                                                                                                                                                                                                                                                |
|------------------|------------------------------------------------------------------------------------------------------------------------------------------------------------------------------------------------------------------------------------------------------------------------------------------------------------------------------------------------------------------------------------------------------------------------------------------------------------------------------------------------------------------------------------------------------------------------------------------------------------------------------------------------------------------------------------------------|
|                  | <p>Chen, T; Liverpool School of Tropical Medicine, Department of Clinical Sciences<br/> Wang, Duolao; Liverpool School of Tropical Medicine<br/> Lalloo, David; Malawi Liverpool Wellcome Trust Clinical Research Centre; Liverpool School of Tropical Medicine<br/> Meintjes, Graeme; University of Cape Town, Medicine<br/> Jaffar, Shabbar; Liverpool School of Tropical Medicine<br/> Harrison, Thomas; St George's University of London<br/> Jarvis, Joseph; Botswana-Harvard AIDS Institute Partnership; London School of Hygiene and Tropical Medicine<br/> Niessen, Louis; Liverpool School of Tropical Medicine, Health Economics; University of Warwick, Dept of Health Sciences</p> |
| <p>Keywords:</p> | <p>HEALTH ECONOMICS, HIV &amp; AIDS &lt; INFECTIOUS DISEASES, Tropical medicine &lt; INFECTIOUS DISEASES, Clinical trials &lt; THERAPEUTICS</p>                                                                                                                                                                                                                                                                                                                                                                                                                                                                                                                                                |
|                  |                                                                                                                                                                                                                                                                                                                                                                                                                                                                                                                                                                                                                                                                                                |

SCHOLARONE™  
Manuscripts

1  
2  
3 **AMBisome Therapy Induction Optimisation (AMBITION): High dose Ambisome for Cryptococcal**  
4  
5 **Meningitis Induction Therapy in sub-Saharan Africa: Economic Evaluation Protocol for a**  
6  
7 **Randomised Controlled Trial Based Equivalence Study.**  
8  
9

10 Ponego Ponatshego (pponatshego@bhp.org.bw)<sup>1\*</sup>

11  
12  
13 David S Lawrence (david.s.lawrence@lshtm.ac.uk)<sup>1,2+\*</sup>,

14  
15  
16 Nabila Youssouf (nabila.youssouf@lshtm.ac.uk)<sup>1,2</sup>,

17  
18  
19 Síle L. F. Molloy (smolloy@sgul.ac.uk)<sup>3</sup>,

20  
21  
22 Melanie Alufandika (malufandika@mlw.mw)<sup>4</sup>,

23  
24  
25 Funeka Bango (funeka.bango@hiv-research.org.za)<sup>5</sup>,

26  
27  
28 David R. Boulware (boulw001@umn.edu)<sup>6,7</sup>,

29  
30  
31 Chimwemwe Chawinga (cchawinga@unclilongwe.org)<sup>8</sup>,

32  
33  
34 Eltas Dziwani (eltas.nyirenda@live.com)<sup>4</sup>,

35  
36  
37 Ebbie Gondwe (egondwe@mlw.mw)<sup>4</sup>,

38  
39  
40 Admire Hlupeni (ahlupeni@gmail.com)<sup>9</sup>,

41  
42  
43 Mina C. Hosseinipour (mina\_hosseinipour@med.unc.edu)<sup>8</sup>,

44  
45  
46 Cecilia Kanyama (ckanyama@gmail.com)<sup>8</sup>,

47  
48  
49 David B. Meya (david.meya@gmail.com)<sup>6</sup>,

50  
51  
52 Mosepele Mosepele (mosepele.mosepele@gmail.com)<sup>1</sup>,

1  
2  
3 Charles Muthoga (chmuthoga@gmail.com)<sup>1</sup>,  
4

5  
6 Conrad Muzoora (conradmuzoora@yahoo.com)<sup>6</sup>,  
7

8  
9 Henry C. Mwandumba (henry.mwandumba@lstmed.ac.uk)<sup>4,10</sup>,  
10

11  
12 Chiratidzo E. Ndhlovu (mascen@mweb.co.zw)<sup>9</sup>,  
13

14  
15 Radha Rajasingham (radha@umn.edu)<sup>6</sup>,  
16

17  
18 Sumaya Sayed (sumaya.sayed@uct.ac.za)<sup>5</sup>,  
19

20  
21 Shepherd Shamu (shamushe@yahoo.com)<sup>9</sup>,  
22

23  
24 Katlego Tsholo (katlego.tsholo@yahoo.ie)<sup>1</sup>,  
25

26  
27 Lillian Tugume (lilliantugume18@gmail.com)<sup>6</sup>,  
28

29  
30 Darlisha Williams (darlisha@gmail.com)<sup>6</sup>,  
31

32  
33 Hendramoorthy Maheswaran (H.Maheswaran@warwick.ac.uk)<sup>11</sup>,  
34

35  
36 Tinevimbo Shiri (tinevimbo.shiri@lstmed.ac.uk)<sup>10</sup>,  
37

38  
39 Timothée Boyer-Chammard (timothee.boyer-chammard@pasteur.fr)<sup>12</sup>,  
40

41  
42 Angela Loyse (aloyse@sgul.ac.uk)<sup>3</sup>,  
43

44  
45 Tao Chen (tao.chen@lstmed.ac.uk)<sup>10</sup>,  
46

47  
48 Duolao Wang (doulao.wang@lstmed.ac.uk)<sup>10</sup>,  
49

50  
51 David G Lalloo (david.lalloo@lstmed.ac.uk)<sup>4,10</sup>,  
52

1  
2  
3 Graeme Meintjes (graemein@mweb.co.za)<sup>5</sup>,  
4

5  
6 Shabbar Jaffar (shabbar.jaffar@lstmed.ac.uk)<sup>10</sup>,  
7

8  
9 Thomas S Harrison (tharriso@sgul.ac.uk)<sup>3</sup>  
10

11  
12 Joseph N Jarvis (joseph.jarvis@lshtm.ac.uk)<sup>1,2\*</sup> and  
13

14  
15 Louis Niessen (louis.niessen@lstmed.ac.uk)<sup>10\*</sup>  
16  
17

18  
19 <sup>1</sup> Botswana-Harvard AIDS Institute Partnership, Gaborone, Botswana  
20

21  
22 <sup>2</sup> Department of Clinical Research, Faculty of Infectious and Tropical Diseases, London School of  
23  
24 Hygiene and Tropical Medicine, London, UK  
25

26  
27 <sup>3</sup> Research Centre for Infection and Immunity, St George's University of London, London, UK  
28

29  
30 <sup>4</sup> Malawi-Liverpool-Wellcome Trust Clinical Research Centre, Blantyre, Malawi  
31  
32

33  
34 <sup>5</sup> Institute of Infectious Diseases and Molecular Medicine, University of Cape Town, Cape Town,  
35  
36 South Africa  
37

38  
39 <sup>6</sup> Infectious Diseases Institute, Makerere University, Kampala, Uganda  
40

41  
42 <sup>7</sup> Department of Medicine, University of Minnesota, Minneapolis, MN, USA  
43  
44

45  
46 <sup>8</sup> Lilongwe Medical Relief Trust (UNC Project), Lilongwe, Malawi  
47

48  
49 <sup>9</sup> Department of Medicine, University of Zimbabwe College of Health Sciences, Parirenyatwa  
50  
51 Hospital, Harare, Zimbabwe  
52

53  
54 <sup>10</sup> Department of Clinical Sciences and International Public Health, Liverpool School of Tropical  
55  
56 Medicine, Liverpool, UK  
57

1  
2  
3  
4  
5  
6  
7  
8  
9  
10  
11  
12  
13  
14  
15  
16  
17  
18  
19  
20  
21  
22  
23  
24  
25  
26  
27  
28  
29  
30  
31  
32  
33  
34  
35  
36  
37  
38  
39  
40  
41  
42  
43  
44  
45  
46  
47  
48  
49  
50  
51  
52  
53  
54  
55  
56  
57  
58  
59  
60

<sup>11</sup> Population Evidence and Technologies, University of Warwick, Coventry, UK

<sup>12</sup> Molecular Mycology Unit and National Reference Centre for Invasive Mycoses, Institut Pasteur, Paris, France

<sup>†</sup>Corresponding author: david.s.lawrence@lshtm.ac.uk +267 7652 4122

\* Equal contribution

**Word count: 3894**

For peer review only

## ABSTRACT

**Introduction:** Cryptococcal meningitis is responsible for around 15% of all HIV-related deaths globally. Conventional treatment courses with amphotericin-B require prolonged hospitalisation and are associated with multiple toxicities and poor outcomes. A phase II study has shown that a single high-dose of liposomal amphotericin may be comparable to standard treatment. We propose a phase III clinical endpoint trial comparing single, high-dose liposomal amphotericin with the WHO recommended first line treatment at six sites across five countries. An economic analysis is essential to support wide-scale implementation.

**Methods and Analysis:** Country-specific economic evaluation tools will be developed across the five country settings. Details of patient and household out of pocket expenses and any catastrophic healthcare expenditure incurred will be collected via interviews from trial patients. Health service patient costs and related household expenditure in both arms will be compared over the trial period in a probabilistic approach, using Monte Carlo bootstrapping methods. Costing information and number of life years survived will be used as the input to a decision-analytic model to assess the cost-effectiveness of a single, high-dose liposomal amphotericin to the standard treatment. In addition, these results will be compared to a historical cohort from another clinical trial.

**Ethics and Dissemination:** The AMBITION trial has been evaluated and approved by the London School of Hygiene and Tropical Medicine, University of Botswana, Malawi National Health Sciences, University of Cape Town, Mulago Hospital and Zimbabwe Medical Research Council research ethics committees. All participants will provide written informed consent or if lacking capacity will have consent provided by a proxy. The findings of this economic analysis, part of the AMBITION trial, will be disseminated through peer-reviewed publications and at international and country-level policy meetings.

**Trial Registration:** ISRCTN: 7250 9687 Date of Registration: 13/07/2017



**STRENGTHS AND LIMITATIONS OF THIS STUDY**

- This economic analysis will provide evidence to inform policy decisions about the use of a more expensive medication in cryptococcal meningitis.
- This analysis will provide data that may justify initiatives to increase the availability of a more expensive medication in cryptococcal meningitis
- This approach will enable the development and application of country-level costing tools across five African country settings which can be re-utilised for future studies and contribute to capacity building in the region.
- The study is taking place at six large referral hospitals across five countries in East and Southern Africa and the results might not be representative or generalisable to remote rural areas or settings in other countries.

## INTRODUCTION

Cryptococcal Meningitis (CM) is a severe fungal infection of the brain which occurs in advanced HIV infection. It is estimated that there are roughly 220,000 cases of CM globally per year with 73% of these occurring in sub-Saharan Africa. Annual global deaths are estimated at 181,000 and CM is responsible for approximately 15% of all AIDS-related deaths(1).

The current recommended first line treatment for CM is amphotericin B deoxycholate (AmBd). AmBd is associated with multiple drug-induced toxicities including anaemia, impaired renal function, and electrolyte abnormalities. AmBd is also difficult to administer, requiring hospitalization for 7 to 14 days of intravenous infusions, depending on which oral antifungal it has been paired with. In addition, treatment outcomes are poor with acute mortality at 10-weeks ranging from 30-55% (2).

The use of a liposomal form of amphotericin called Ambisome (hereafter referred to as L-AmB) is associated with reduced drug induced-toxicities when compared to conventional AmBd(3). The long tissue half-life and effective penetration into the brain tissue of L-AmB has prompted research into the effectiveness of treatment with short courses of high-dose L-AmB(4). The AMBisome Therapy Induction Optimisation (AMBITION) phase II clinical trial conducted in Botswana and Tanzania found that a single, high-dose of 10mg/kg L-AmB was well tolerated and led to a non-inferior reduction in fungal burden in cerebrospinal fluid when compared to standard 14-day courses of 3mg/kg L-AmB(5). This dosing strategy is now being taken to a clinical endpoint trial.

The phase III AMBITION trial is a phase III open label randomised control non-inferiority trial to compare single, high-dose L-AmB treatment to the WHO first-line recommended regimen of a 7-day course of AmBd based treatment in avoiding all-cause mortality in HIV-associated CM (Figure 1)(6). Eligible patients will be randomised to receive either:

- 1
- 2
- 3 1. L-AmB 10 mg/kg day 1 given with 14-days of fluconazole 1200mg/day and flucytosine
- 4 100mg/kg/day (single dose) or
- 5
- 6
- 7 2. Amphotericin B deoxycholate 1 mg/kg/d for 7-days given with 7-days of flucytosine
- 8 100mg/kg/day followed by 7-days of fluconazole 1200mg/day (control arm).
- 9
- 10

11 After the 2-week induction phase all patients will receive fluconazole 800 mg/day to 10 weeks and  
12 200 mg/day thereafter. ART will be commenced 4 to 6 weeks after initiation of antifungal therapy.  
13  
14 The trial will enrol 850 patients across six sites in five countries in Africa: Gaborone, Botswana (90);  
15  
16 Blantyre (230) and Lilongwe (110), Malawi; Cape Town, South Africa (80); Kampala, Uganda (110)  
17  
18 and Harare, Zimbabwe (230). All participants will be invited to take part in the economic evaluation  
19  
20 study.  
21  
22  
23

24  
25 The use of L-AmB has potential implications for both clinical outcomes and healthcare costs. The  
26  
27 widespread availability of L-AmB has previously been limited by the high cost of therapy: currently  
28  
29 the internationally listed price is \$85 per 50mg vial compared to \$8 per 50mg vial of AmBd. The  
30  
31 listed cost per patient of the medication for the single dose arm in this trial will be \$996 versus \$132  
32  
33 for the control arm. However, the impact of a potentially more clinically effective intervention that is  
34  
35 associated with fewer drug-induced toxicities and a reduced length of hospital stay may offset this  
36  
37 expense. An argument for widening access to L-AmB could be strengthened further if the price of  
38  
39 the drug can be negotiated with the manufacturer, Gilead, as is the case with the same drug as part  
40  
41 of the expanded access programme for visceral leishmaniasis.  
42  
43  
44

45  
46 We plan an economic analysis to estimate the cost consequences and the cost-effectiveness of  
47  
48 short-course L-AmB treatment, compared to the control arm, in five individual country settings  
49  
50 across sub-Saharan Africa. The findings will also be compared to a historical cohort from the recently  
51  
52 completed Advancing Cryptococcal Meningitis Treatment for Africa (ACTA) trial. The ACTA trial  
53  
54 recruited patients in Cameroon, Malawi, Tanzania and Zambia and compared treatment outcomes  
55  
56  
57  
58  
59

1  
2  
3 among individuals receiving one of five different treatment regimens, including the control arm used  
4 in the AMBITION trial (7). The purpose of this comparison is to identify any change in costs over  
5 time, any gross variation in health service costs between the AMBITION and ACTA cohorts, and to  
6 enable comparison of the cost-effectiveness of the short course L-AmB with the other regimens  
7 tested in ACTA.  
8  
9  
10  
11  
12

13  
14 The hypotheses are that the short course treatment:  
15

- 16  
17  
18 1. Will show a zero-net societal cost change or that there will be societal cost savings from the  
19 short L-AmB treatment and an equivalent or increased effectiveness of the treatment  
20 reducing mortality over a patient life time. Will be cost-effective in terms of life years saved  
21 over a patient lifetime when compared to historical cohorts who received different  
22 combination treatment regimens in a recently completed clinical trial.  
23  
24  
25  
26  
27  
28

29 These analyses will aim to provide the economic evidence to support wide-scale implementation of  
30 short-course L-AmB treatment across sub-Saharan settings.  
31  
32  
33  
34  
35  
36  
37

### 38 **OBJECTIVES:**

39  
40  
41 The main objective of the economic analysis is to assess the cost-effectiveness of single, high-dose L-  
42 AmB compared to the control arm treatment regimen for HIV associated CM across the five country  
43 settings in six sites.  
44  
45  
46  
47

### 48 **Secondary Objectives:**

- 49  
50  
51 • To assess the cost-consequences from the societal and health service perspective of single,  
52 high-dose L-AmB compared to the control arm across the five country settings.  
53  
54  
55  
56 • To assess the total health service costs per patient at each country site.  
57  
58  
59

- To assess out-of-pocket expenses incurred by patients and households at all trial sites.
- To assess the percentage of catastrophic household expenditure experienced by patients at each trial site.
- To compare the total societal costs per patient and cost-effectiveness of a single, high-dose L-AmB with historical cohorts that received different treatment regimens within the ACTA trial.

## **METHODS AND ANALYSIS**

### **Study Design**

The study is a prospective economic evaluation from the societal perspective – including both health service and patient related perspectives - comparing the costs and effectiveness of the two interventions at each of the six trial sites across the five country settings. The two key components of this study are the collection of data concerning personal expenditure on health and the development of country costing tools which will be applied to data concerning health-service costs collected within the trial.

### **Household expenditure**

To estimate the societal costs at the patient and household level, they or their representatives will be interviewed at two points in time: within the first five days of randomisation and at their final face-to-face follow-up at week 10. The questionnaires, based on those used in the ACTA trial and further developed for this study, are designed to estimate their personal healthcare expenditure in the four weeks leading up to enrolment and during the trial (Table 1). In addition, the out-of-pocket

1  
2  
3 health care expenditure by the individual and their household, loss of income incurred due to illness,  
4  
5 and loss of labour time of the patients themselves and their carers will be collected using methods  
6  
7 adopted in trials of a similar nature(8).  
8  
9

10 **Table 1: Structure of the health economics questionnaire for the AMBITION study.**  
11  
12

- |                                                                                                                                                                                                                                                                                                                                                                                                                                                                                                                                                                                                                                                                                                                                                                                                                                                                                                                                                                                                                               |
|-------------------------------------------------------------------------------------------------------------------------------------------------------------------------------------------------------------------------------------------------------------------------------------------------------------------------------------------------------------------------------------------------------------------------------------------------------------------------------------------------------------------------------------------------------------------------------------------------------------------------------------------------------------------------------------------------------------------------------------------------------------------------------------------------------------------------------------------------------------------------------------------------------------------------------------------------------------------------------------------------------------------------------|
| <ul style="list-style-type: none"><li>• Personal health expenditure including on consultations, medication, travel time and costs</li><li>• Relative and/or household health expenditure in relation to the patient's condition</li><li>• The duration and severity of the illness episode</li><li>• Loss of productivity and time off work for both patient and relative/s</li><li>• Profession and educational attainment of patient</li><li>• Profession and educational attainment of the person who earns the highest income (if not the patient)</li><li>• Access to social security, welfare support and health insurance</li><li>• Household expenditure on food, utilities, rent and large purchases such as cars, furniture and electrical items to assess the socio-economic status of the household</li><li>• The need for temporary loans or the sale of assets to fund health care and other costs in relation to the illness episode</li><li>• The level of disability and care needs of the patient</li></ul> |
|-------------------------------------------------------------------------------------------------------------------------------------------------------------------------------------------------------------------------------------------------------------------------------------------------------------------------------------------------------------------------------------------------------------------------------------------------------------------------------------------------------------------------------------------------------------------------------------------------------------------------------------------------------------------------------------------------------------------------------------------------------------------------------------------------------------------------------------------------------------------------------------------------------------------------------------------------------------------------------------------------------------------------------|
- 13  
14  
15  
16  
17  
18  
19  
20  
21  
22  
23  
24  
25  
26  
27  
28  
29  
30  
31  
32  
33  
34  
35  
36  
37  
38  
39  
40  
41  
42  
43  
44

45 The interview questions will preferably be asked directly to the patient. If the patient is confused or  
46 has reduced consciousness due to CM, a relative or next-of-kin may provide proxy consent for them  
47 to enrol in the trial. It is unlikely that this person will be fully aware of the patient's financial  
48 situation and in these cases, it may be necessary to wait for the patient to recover before asking  
49 them directly. In cases where patients have prolonged confusion or are felt to have a poor prognosis  
50 then these questions can be asked of the proxy. Data will be collected by study doctors and nurses  
51  
52  
53  
54  
55  
56  
57  
58  
59  
60

1  
2  
3 and entered into the trial Electronic Data Capture (EDC) system: a uniform database to be utilised  
4  
5 across all sites. An interview guide for those collecting data from patients will ensure that nuances  
6  
7 and country specific idioms are acknowledged.  
8  
9

10 The above methods have been developed through an iterative process. Initially the lead Health  
11  
12 Economist, who led on the ACTA cost-effectiveness analysis, and members of the Trial Management  
13  
14 Group developed the data collection tools and integrated these into the wider trial EDC. This was  
15  
16 later refined following a one-week meeting of health economists and study team members from  
17  
18 across the AMBITION sites held in Blantyre, Malawi in November 2017. This provided the  
19  
20 opportunity for experts working in this field and individuals who will collect data from patients to  
21  
22 improve these tools by collecting and entering data from fabricated patients. Feedback was then  
23  
24 integrated into both the data collection methods and the EDC and shared for final approval across  
25  
26 the AMBITION consortium until a consensus was reached.  
27  
28  
29  
30  
31  
32

### 33 **Country-specific costing approaches**

34  
35  
36 Presently, each site has differing levels of experience with conducting economic analyses and has  
37  
38 varied access to validated country costing tools. As stated, the preparation of the trial included a  
39  
40 one-week workshop with at least two team members from each site to assess the face-validity and  
41  
42 completeness of the questionnaire, to practise electronic data entry of the completed questionnaire,  
43  
44 carrying costing computations, and to increase the knowledge and understanding of economic  
45  
46 evaluation.  
47  
48  
49

50 Botswana Harvard AIDS Institute Partnership (BHP): Gaborone, Botswana.  
51  
52

53 BHP will use a micro-costing approach to estimate CM treatment in Botswana from a single health  
54  
55 provider's perspective, in this case, from the Ministry of Health and Wellness perspective. The total  
56  
57  
58  
59

1  
2  
3 of related costs i.e. patient-specific treatment cost and 'hotel costs' to cover CM treatment will be  
4  
5 determined as per the 2016 Botswana HIV Treatment Guidelines(9). All costs of pharmaceuticals will  
6  
7 be taken from the listed tender prices at the Central Medical Stores which procure stock and  
8  
9 distribute pharmaceuticals and healthcare commodities to all government healthcare facilities. This  
10  
11 package will provide an estimate of 'patient specific' costs of uncomplicated CM. 'Hotel costs' will  
12  
13 determine the necessary hospital, staffing, capital and infrastructure requirements as the patient is  
14  
15 admitted over a seven-day period. Data will be obtained from Princess Marina Hospital which is the  
16  
17 biggest and main referral hospital in Botswana. Staff salaries will be taken from the Government of  
18  
19 Botswana salary scales for health professionals. By combining this treatment costing data with the  
20  
21 meningitis burden data generated through a previously completed audit we will also generate an  
22  
23 estimate of the total current costs to the Botswana health service of treating CM. The data will  
24  
25 complement the 'Estimated resource needs for key health interventions offered under Botswana's  
26  
27 Essential Health Services Plan (2013-2018)(10)' that project the cost of all health programs, including  
28  
29 the treatment of CM, from 2013 to 2018 and will also be used as a reference for the next version of  
30  
31 this document to be published in 2019.  
32  
33  
34  
35  
36  
37  
38

39 Malawi Liverpool Wellcome Trust Clinical Research Centre: Blantyre, Malawi.  
40  
41

42 Standardised national health costing data is not available in Malawi. An existing costing tool which  
43  
44 was developed for a HIV testing study will be adapted(11). Patient-related health care costs will be  
45  
46 obtained from the Central Medical Stores Trust, the only supplier mandated to supply government  
47  
48 health facilities in Malawi. Personnel costs will be refined by referencing the Malawi government  
49  
50 salary structures and payroll and estimating the proportion of health personnel time taken in the  
51  
52 clinical care of the patient, as well as allowance costs for patients working out of working hours.  
53  
54  
55  
56  
57  
58  
59  
60



1  
2  
3 Programme-related costs will be adapted using the results from recent costing studies within the  
4  
5 Queen Elizabeth Central Hospital(11).  
6  
7  
8  
9

10  
11 University of North Carolina Project: Lilongwe, Malawi.  
12  
13

14 Most of costing data for Lilongwe will be obtained using the same methods as that outlined above  
15  
16 for Blantyre. In addition, local programme-related costs will be estimated and projected through a  
17  
18 local costing study within the Kamuzu Central Hospital. This adaptation will be based on existing  
19  
20 local costing data as part of the Driving Reduced AIDS-associated Meningo-encephalitis (DREAMM)  
21  
22 study which will be shared with the AMBITION consortium.  
23  
24  
25  
26  
27  
28

29 University of Cape Town: Cape Town, South Africa.  
30  
31

32 There are currently no costing tools for primary data collection for disease specific costing of CM  
33  
34 treatment in South Africa. A costing tool will be developed from validated disease specific costing  
35  
36 tools for the South African context(12). Costs from the health service (Department of Health)  
37  
38 perspective will be collected using the ingredients costing approach and captured in an Excel  
39  
40 spreadsheet. The quantity of resources used to treat CM in each study arm will be estimated from  
41  
42 the trial and patient records. Prices for these treatment related ingredients will be obtained from  
43  
44 the various service providers within the Department of Health that are responsible for offering the  
45  
46 products and services. Specific activities by staff will be identified and estimated through the review  
47  
48 of routinely collected time sheets. Human resource costs as well as recurrent and capital costs will  
49  
50 be allocated using hospital expenditure and financial records as well as records from the Provincial  
51  
52 Department of Health. The average cost of each treatment component will be calculated by  
53  
54 multiplying the quantity of resources used by the unit price. From this we can calculate the cost per  
55  
56  
57  
58  
59  
60

1  
2  
3 case of CM treated by multiplying the average cost by the number of times a particular cost has  
4  
5 been incurred.  
6  
7  
8  
9

10  
11 Infectious Diseases Institute: Kampala, Uganda.  
12  
13

14 Though there is a high burden of CM in Uganda, the costs associated with treatment have not been  
15 formally outlined in a costing tool. Previous research describing the costs of treatment used  
16 informally gathered estimates for treatment and management of the disease based on reports from  
17 various sources including local pharmacies, laboratories and the Ugandan Ministry of Health(13).  
18 The Uganda team will create a systematic costing tool for CM. This tool will consider the costs of  
19 treatment as well as the costs borne by the patients being treated. The creation of this tool will  
20 involve input from the Ministry of Health as well as the major suppliers of medications. We will  
21 engage these organizations and other key stakeholders to ascertain the current costs of meningitis  
22 treatment and develop a costing tool which can be adjusted in the future should costs change.  
23  
24  
25  
26  
27  
28  
29  
30  
31  
32  
33  
34  
35  
36  
37

38 University of Zimbabwe School of Health Sciences: Harare, Zimbabwe.  
39  
40

41 Clinical cost data will be collected alongside the clinical trial using micro-costing methodologies. The  
42 economic evaluation will be done from the societal perspective to enable the study to assess the  
43 overall household economic impact of CM and will enable us to determine the patient and provider  
44 unit costs. This study is powered enough to detect both country specific clinical and economic  
45 differences. Direct patient level clinical activity data such as drugs, staff time, diagnostics, pathology  
46 and radiology will be collected alongside the trial and relevant unit costs determined using the study  
47 protocol. In other cases, prices for drugs, diagnostic and radiology tests will be collected from the  
48 National Pharmaceutical Company of Zimbabwe, national reference diagnostic and radiology  
49  
50  
51  
52  
53  
54  
55  
56  
57  
58  
59  
60

1  
2  
3 laboratories, and from consultations with experts. Indirect and overhead costs such as management  
4  
5 and administration costs, utilities and other capital costs for in-patient days will be determined using  
6  
7 data from Parirenyatwa Hospital, Harare financial records, the WHO Choice Database and from  
8  
9 previous clinical trials that took place at the proposed site(14).  
10

### 11 12 **Data collection and data management**

13  
14  
15 Data collected and validated using the EDC system will be stored in an electronic database that is  
16  
17 protected using a scheme of authentication and encryption. Paper documents, such as clinical notes  
18  
19 and administrative documentation will be kept in a secure location and held for 5 years after the end  
20  
21 of the trial. During this period, all data should be accessible to the competent or equivalent  
22  
23 authorities, the Sponsor and other relevant parties with suitable notice. Security of electronic  
24  
25 records and data is a significant concern. All components of the distributed data systems will use  
26  
27 authentication and encryption to render subject identity and personal health information unusable,  
28  
29 unreadable, or indecipherable to unauthorized individuals. Full Drive Encryption will be  
30  
31 implemented at the hardware layer of all devices storing protected health information. A three-  
32  
33 factor scheme will be used to authenticate users through the hardware layer to the application layer  
34  
35 where personal health information is available. The applications will have user profiles to control  
36  
37 access to certain data and reports. The application and database layers will use a combination of  
38  
39 hashing and encryption for sensitive and personal data. Mobile devices and the staff operating them  
40  
41 will not be equipped with the encryption keys to decrypt selected sensitive data fields.  
42  
43  
44  
45  
46  
47  
48

### 49 **Confidentiality**

50  
51  
52 The trial will be conducted in compliance with the approved protocol, the Declaration of Helsinki  
53  
54 2008, the principles of Good Clinical Practice and applicable national regulations. We plan to follow  
55  
56  
57  
58  
59

1  
2  
3 the principles of the UK Data Protection Act (DPA) regardless of the countries where the trial is being  
4  
5 conducted. Consent forms will be stored under the supervision of each local primary investigator in  
6  
7 a secured office and accessible to trial staff only. The database will not hold personal details as  
8  
9 participants are identified by their study number throughout the trial.  
10

## 11 **Data analysis**

12  
13  
14  
15 As outlined above, information on resource use and number of units used will be collected at  
16  
17 patient-level through the EDC, as part of the trial, and through additional separate country costing  
18  
19 studies. To validate and refine the data collection process an interim analysis will take place after the  
20  
21 first 20 patients have been recruited.  
22

23  
24  
25 Upon closure of the study full data analysis will commence. Firstly, an empirical cost-consequence  
26  
27 analysis will take place, using empirical individual patient data on societal resource use and unit cost  
28  
29 based on the results from the costing studies(16). Both societal and health care perspectives are  
30  
31 chosen, and health service patient costs including household costs, treatment cost and  
32  
33 hospitalisations in both arms will be compared over the trial period in a probabilistic approach, using  
34  
35 Monte Carlo bootstrapping methods. To handle the heterogeneity of the trial population in within  
36  
37 trial evaluation, we will derive a benefit value for each patient from the observed costs and effects  
38  
39 and then construct a regression model with treatment variable and collected explanatory variables.  
40  
41 Next, the costing information and number of life years' survival will be used in a decision-analytic  
42  
43 model to assess the cost-effectiveness of the single, high-dose arm against the control arm and also  
44  
45 against other combination treatment regimens from the ACTA trial. Results will be presented using  
46  
47 incremental cost-effectiveness ratios and cost-effectiveness acceptability curves generated by  
48  
49 Monte Carlo bootstrapping methods. This approach avoids the stochastic fallacy and will determine  
50  
51 if a single, high-dose L-AmB will be as or even more cost-effective compared to the current WHO  
52  
53 recommended first-line treatment.  
54  
55  
56  
57  
58  
59  
60

1  
2  
3 An existing model will be adapted based on Jarvis et al., using the treatment sub-model (Figure  
4 2)(17). The Markov model has a monthly cycle length, running the model for 12 cycles to calculate  
5 annual costs and annual life years. We will supplement the model to be able to extrapolate data  
6 beyond the period of observed follow-up. The Markov modelling framework allows for the synthesis  
7 of data from secondary sources, like mortality risk from other causes and excess mortality risks(13).  
8 It also allows for probabilistic sensitivity analyses. The other country teams will be able to use an  
9 adapted model to enter their country specific data and costing information as well as estimated  
10 survival figures, while using the pooled effectiveness information. In this way, each country will  
11 arrive at valid country-specific economic estimates.  
12  
13  
14  
15  
16  
17  
18  
19  
20  
21  
22

23 We will follow the CHEERS appraisal guidelines on economic evaluation(18). As our study is an  
24 equivalence study using empirical data in a model-based analysis these guidelines we will also  
25 include good modelling practice approaches(19).  
26  
27  
28  
29

30 We anticipate the development of five different country-specific costing tools for CM which can be  
31 used to compose two five-country manuscripts concerning the cost-consequence of CM across sites  
32 as well as the cost-effectiveness of the intervention across sites. In addition, individual country-level  
33 publications will be allowed, using the whole five-country trial data base, complemented with local  
34 more detailed country-level costing studies.  
35  
36  
37  
38  
39  
40

41 We intend to use these findings to provide an economic argument for the adoption of single, high-  
42 dose L-AmB in low and middle-income countries and to help influence guidelines and policy. Another  
43 important component of this study is capacity building across the African sites through the delivery  
44 of a health economics course and the ongoing mentoring of individuals and teams at each of the  
45 sites.  
46  
47  
48  
49  
50  
51

## 52 53 **ETHICS AND DISSEMINATION** 54 55 56 57 58 59 60

1  
2  
3 The Research Ethics Committee of the London School of Hygiene and Tropical Medicine have  
4 approved the AMBITION trial protocol v2.1 07.11.17 which outlines this economic analysis (Ref  
5 14355). Approval has also been granted by the following: University of Botswana Office of Research  
6 and Development (UBR/RES/IRB/BIO/042), Botswana Ministry of Health and Wellness Health  
7 Research and Development Division (HPDME:13/18/1), Princess Marina Hospital Research and Ethics  
8 Committee (PMH 5/79(407-1-2017), University of Cape Town Human Research Ethics Committee  
9 (642/2017), Malawi National Health Sciences Research Committee (1907), Mulago Hospital Research  
10 and Ethics Committee (MHREC 1297) and the Medical Research Council of Zimbabwe  
11 (MRCZ/A/2263). Any amendments will be submitted and approved by each ethics committee. All  
12 participants will provide written informed consent or if lacking capacity will have consent provided  
13 by a proxy. The findings of this economic analysis, which is embedded into the AMBITION trial, will  
14 be disseminated through peer-reviewed publications and at international and country-level policy  
15 meetings.

## 34 **DISCUSSION AND CONCLUSION**

35  
36  
37 This phase III clinical endpoint trial comparing single, high-dose liposomal amphotericin to the  
38 control arm treatment at six sites across five counties will provide valuable information on the  
39 comparative effectiveness with existing and other proposed strategies. This will be based on the  
40 effectiveness of simplified treatment strategies as well on the possibly increased safety. The  
41 proposed economic analysis of the equivalence trial for the Malawi situation will allow for a realistic  
42 comparison with settings where there is very limited coverage of appropriate treatment of CM in  
43 people with HIV. The estimates from other trial settings will help to document the generalizability of  
44 our findings. The economic information will be essential in the support of wide-scale

1  
2  
3 implementation strategies and the formulation and testing of alternative delivery modes in all  
4  
5 comparable sub Saharan setting.  
6  
7

8 A clinically effective and safer treatment for CM in sub-Saharan Africa could have a dramatic impact  
9  
10 on HIV-associated mortality in the region. This economic analysis is essential to help justify any  
11  
12 policy change towards increasing the availability of more expensive medication if is proven to be  
13  
14 cost-effective. This process will enable the development of country-specific costing tools across five  
15  
16 African sites which can be utilised for future studies and will build capacity in the region.  
17  
18

19  
20 **Authors Contributions:** PP and DSL jointly wrote the manuscript. DSL created the data collection  
21  
22 tools for the study. NY and SM have provided critical input into the data collection tools and  
23  
24 manuscript. DB, MH, CK, DM, MM, CM, HM, and CN are site investigators. MA, FB, CC, ED, EG, AH,  
25  
26 CM, RR, SS, LT, KT and DW are individuals responsible for the health economics sub-study at the  
27  
28 sites who have contributed to the refining of the data collection tools. TC, and DW are statisticians  
29  
30 for the study. TS and HM are health economists. TBC is international clinical adviser to the study. AL  
31  
32 is an expert adviser. DGM, GM and SJ provided expert input into the conceptualisation and design of  
33  
34 the broader study and this sub-study. TH and JNJ conceived and designed the broader study and are  
35  
36 the co-principal investigators. LN leads the Health Economics sub-study and has provided oversight  
37  
38 of the entire process. All authors read and approved the final manuscript.  
39  
40  
41  
42  
43  
44

45 **Funding:** The study is jointly funded through the European Developing Countries Clinical Trials  
46  
47 Partnership (EDCTP), the Swedish International Development Cooperation Agency (SIDA), and the  
48  
49 Wellcome Trust / Medical Research Council (UK) / UKAID Joint Global Health Trials.  
50  
51  
52  
53  
54  
55  
56  
57  
58  
59  
60

1  
2  
3 **Competing Interests:** JNJ and TSH were the recipients of a Gilead Investigator Initiated Award  
4  
5 (completed). TSH has received speaker fees from Gilead Sciences and Pfizer.  
6  
7

8 Figure 1. Economic Evaluation Flow Diagram: Trial Entry, Randomisation, Treatment and follow-up.  
9

10  
11 Figure 2. Simplified Markov model structure to evaluate the CM treatment(17).  
12  
13  
14  
15  
16  
17  
18  
19  
20

## 21 REFERENCES

- 22  
23  
24 1. Rajasingham R, Smith RM, Park BJ, Jarvis JN, Govender NP, Chiller TM, et al. Global burden of  
25 disease of HIV-associated cryptococcal meningitis: an updated analysis. *The Lancet Infectious*  
26 *diseases*. 2017;17(8):873-81.  
27  
28  
29  
30  
31 2. Jarvis JN, Harrison TS. Forgotten but not gone: HIV-associated cryptococcal meningitis. *The*  
32 *Lancet Infectious diseases*. 2016;16(7):756-8.  
33  
34  
35  
36  
37 3. Hamill RJ, Sobel JD, El-Sadr W, Johnson PC, Graybill JR, Javaly K, et al. Comparison of 2 doses  
38 of liposomal amphotericin B and conventional amphotericin B deoxycholate for treatment of AIDS-  
39 associated acute cryptococcal meningitis: a randomized, double-blind clinical trial of efficacy and  
40 safety. *Clinical infectious diseases : an official publication of the Infectious Diseases Society of*  
41 *America*. 2010;51(2):225-32.  
42  
43  
44  
45  
46  
47  
48 4. Lestner J, McEntee L, Johnson A, Livermore J, Whalley S, Schwartz J, et al. Experimental  
49 *Models of Short Courses of Liposomal Amphotericin B for Induction Therapy for Cryptococcal*  
50 *Meningitis*. *Antimicrobial agents and chemotherapy*. 2017;61(6).  
51  
52  
53  
54  
55  
56  
57  
58  
59  
60



- 1  
2  
3 5. Jarvis J, Leeme T, Molefi M, Chofle AA, Bidwell G, Tsholo K, et al. Short Course High-dose  
4 Liposomal Amphotericin B for HIV-associated Cryptococcal Meningitis: A phase-II Randomized  
5 Controlled Trial. CID. 2018;published online June 26, 2018.  
6  
7  
8  
9
- 10 6. WHO. Guidelines for the diagnosis, prevention, and management of cryptococcal disease in  
11 HIV-infected adults, adolescents and children. Geneva: World Health Organisation; 2018 March  
12 2018.  
13  
14  
15
- 16 7. Molloy SF, Kanyama C, Heyderman RS, Loyse A, Kouanfack C, Chanda D, et al. Antifungal  
17 Combinations for Treatment of Cryptococcal Meningitis in Africa. The New England journal of  
18 medicine. 2018;378(11):1004-17.  
19  
20  
21  
22  
23
- 24 8. Campbell SJ, Osei-Atweneboana MY, Stothard R, Koukounari A, Cunningham L, Armoo SK, et  
25 al. The COUNTDOWN Study Protocol for Expansion of Mass Drug Administration Strategies against  
26 Schistosomiasis and Soil-Transmitted Helminthiasis in Ghana. Trop Med Infect Dis. 2018;3(1):10.  
27  
28  
29  
30  
31
- 32 9. Handbook of the Botswana 2016 Integrated HIV Clinical Care Guidelines. Botswana: Republic  
33 of Botswana Ministry of Health; 2016.  
34  
35  
36  
37
- 38 10. Menon V, Iyer P, Mosime W. Estimated resource needs for key health interventions offered  
39 under Botswana's Essential Health Services Plan (2013-2018). Washington, DC: Futures Group,  
40 Health Policy Project.; 2014.  
41  
42  
43  
44
- 45 11. Maheswaran H, Petrou S, MacPherson P, Choko AT, Kumwenda F, Lalloo DG, et al. Cost and  
46 quality of life analysis of HIV self-testing and facility-based HIV testing and counselling in Blantyre,  
47 Malawi. BMC medicine. 2016;14:34.  
48  
49  
50  
51  
52  
53  
54  
55  
56  
57  
58  
59  
60

- 1  
2  
3 12. Hendriks ME, Kundu P, Boers AC, Bolarinwa OA, Te Pas MJ, Akande TM, et al. Step-by-step  
4 guideline for disease-specific costing studies in low- and middle-income countries: a mixed  
5 methodology. *Global health action*. 2014;7:23573.  
6  
7  
8  
9  
10 13. Rajasingham R, Rolfes MA, Birkenkamp KE, Meya DB, Boulware DR. Cryptococcal meningitis  
11 treatment strategies in resource-limited settings: a cost-effectiveness analysis. *PLoS medicine*.  
12 2012;9(9):e1001316.  
13  
14  
15 14. Medina Lara A, Kigozi J, Amurwon J, Muchabaiwa L, Nyanzi Wakaholi B, Mujica Mota RE, et  
16 al. Cost effectiveness analysis of clinically driven versus routine laboratory monitoring of  
17 antiretroviral therapy in Uganda and Zimbabwe. *PLoS One*. 2012;7(4):e33672.  
18  
19  
20  
21  
22 15. Organization WH. Making choices in health: WHO guide to cost-effectiveness analysis. Tan-  
23 Torres Edejer T, editor2003.  
24  
25  
26  
27  
28  
29  
30 16. Span MM, TenVergert EM, van der Hilst CS, Stolk RP. Noninferiority testing in cost-  
31 minimization studies: Practical issues concerning power analysis. *International journal of technology*  
32 *assessment in health care*. 2006;22(2):261-6.  
33  
34  
35  
36  
37 17. Jarvis JN, Harrison TS, Lawn SD, Meintjes G, Wood R, Cleary S. Cost effectiveness of  
38 cryptococcal antigen screening as a strategy to prevent HIV-associated cryptococcal meningitis in  
39 South Africa. *PloS one*. 2013;8(7):e69288.  
40  
41  
42  
43  
44  
45 18. Husereau D, Drummond M, Petrou S, Carswell C, Moher D, Greenberg D, et al. Consolidated  
46 Health Economic Evaluation Reporting Standards (CHEERS)--explanation and elaboration: a report of  
47 the ISPOR Health Economic Evaluation Publication Guidelines Good Reporting Practices Task Force.  
48 *Value in health : the journal of the International Society for Pharmacoeconomics and Outcomes*  
49 *Research*. 2013;16(2):231-50.  
50  
51  
52  
53  
54  
55  
56  
57  
58  
59  
60

1  
2  
3  
4  
5  
6  
7  
8  
9  
10  
11  
12  
13  
14  
15  
16  
17  
18  
19  
20  
21  
22  
23  
24  
25  
26  
27  
28  
29  
30  
31  
32  
33  
34  
35  
36  
37  
38  
39  
40  
41  
42  
43  
44  
45  
46  
47  
48  
49  
50  
51  
52  
53  
54  
55  
56  
57  
58  
59  
60

19. Philips Z, Bojke L, Sculpher M, Claxton K, Golder S. Good practice guidelines for decision-analytic modelling in health technology assessment: a review and consolidation of quality assessment. *Pharmacoeconomics*. 2006;24(4):355-71.

For peer review only

1  
2  
3  
4  
5  
6  
7  
8  
9  
10  
11  
12  
13  
14  
15  
16  
17  
18  
19  
20  
21  
22  
23  
24  
25  
26  
27  
28  
29  
30  
31  
32  
33  
34  
35  
36  
37  
38  
39  
40  
41  
42  
43  
44  
45  
46  
47  
48  
49  
50  
51  
52  
53  
54  
55  
56  
57  
58  
59  
60

For peer review only

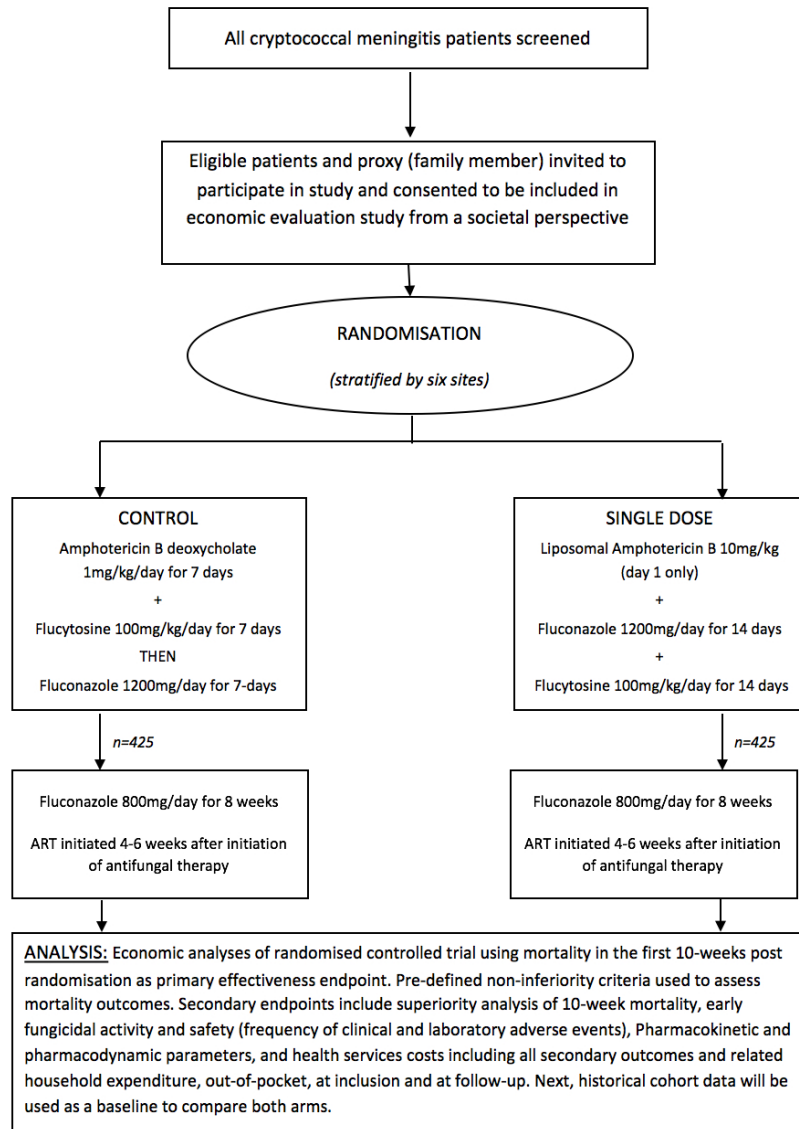

Figure 1. Economic Evaluation Flow Diagram: Trial Entry, Randomisation, Treatment and follow-up.

177x231mm (144 x 144 DPI)

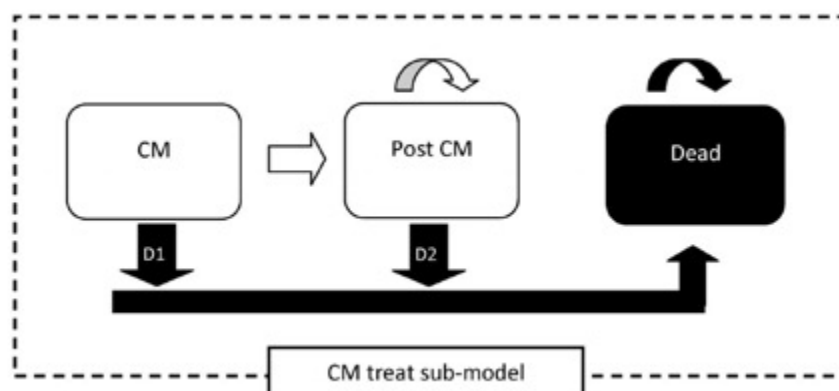

Figure 2. Simplified Markov model structure to evaluate the CM treatment(17).

159x73mm (72 x 72 DPI)

# BMJ Open

**AMBIsome Therapy Induction Optimisation (AMBITION):  
High dose Ambisome for Cryptococcal Meningitis Induction  
Therapy in sub-Saharan Africa: Economic Evaluation  
Protocol for a Randomised Controlled Trial Based  
Equivalence Study**

|                               |                                                                                                                                                                                                                                                                                                                                                                                                                                                                                                                                                                                                                                                                                                                                                                                                                                                                                                                                                                                                                                                                                                                                                                                                                                                                                                                                                                                                                                                                                                                                                                                                                                                                                                                                                                                                                                                                                                                                                                                                                                                                                                                         |
|-------------------------------|-------------------------------------------------------------------------------------------------------------------------------------------------------------------------------------------------------------------------------------------------------------------------------------------------------------------------------------------------------------------------------------------------------------------------------------------------------------------------------------------------------------------------------------------------------------------------------------------------------------------------------------------------------------------------------------------------------------------------------------------------------------------------------------------------------------------------------------------------------------------------------------------------------------------------------------------------------------------------------------------------------------------------------------------------------------------------------------------------------------------------------------------------------------------------------------------------------------------------------------------------------------------------------------------------------------------------------------------------------------------------------------------------------------------------------------------------------------------------------------------------------------------------------------------------------------------------------------------------------------------------------------------------------------------------------------------------------------------------------------------------------------------------------------------------------------------------------------------------------------------------------------------------------------------------------------------------------------------------------------------------------------------------------------------------------------------------------------------------------------------------|
| Journal:                      | <i>BMJ Open</i>                                                                                                                                                                                                                                                                                                                                                                                                                                                                                                                                                                                                                                                                                                                                                                                                                                                                                                                                                                                                                                                                                                                                                                                                                                                                                                                                                                                                                                                                                                                                                                                                                                                                                                                                                                                                                                                                                                                                                                                                                                                                                                         |
| Manuscript ID                 | bmjopen-2018-026288.R1                                                                                                                                                                                                                                                                                                                                                                                                                                                                                                                                                                                                                                                                                                                                                                                                                                                                                                                                                                                                                                                                                                                                                                                                                                                                                                                                                                                                                                                                                                                                                                                                                                                                                                                                                                                                                                                                                                                                                                                                                                                                                                  |
| Article Type:                 | Protocol                                                                                                                                                                                                                                                                                                                                                                                                                                                                                                                                                                                                                                                                                                                                                                                                                                                                                                                                                                                                                                                                                                                                                                                                                                                                                                                                                                                                                                                                                                                                                                                                                                                                                                                                                                                                                                                                                                                                                                                                                                                                                                                |
| Date Submitted by the Author: | 29-Jan-2019                                                                                                                                                                                                                                                                                                                                                                                                                                                                                                                                                                                                                                                                                                                                                                                                                                                                                                                                                                                                                                                                                                                                                                                                                                                                                                                                                                                                                                                                                                                                                                                                                                                                                                                                                                                                                                                                                                                                                                                                                                                                                                             |
| Complete List of Authors:     | <p>Ponatshego, Ponego; Botswana-Harvard AIDS Institute Partnership, Clinical Trials Unit<br/> Lawrence, David; Botswana-Harvard AIDS Institute Partnership, Clinical Trials Unit; London School of Hygiene and Tropical Medicine Department of Clinical Research<br/> Youssof, Nabila; London School of Hygiene and Tropical Medicine, EPH; Botswana-Harvard AIDS Institute Partnership<br/> Molloy, Sile; St. George's University of London<br/> Alufandika, melanie; Malawi-Liverpool-Wellcome Trust Clinical Research Centre<br/> Bango, Funeka; Institute of Infectious Diseases and Molecular Medicine Boulware, David R.; Univ Minnesota<br/> Chawinga, Chimwemwe; Lilongwe Medical Relief Trust (UNC Project)<br/> Dziwani, Eltas; Malawi-Liverpool-Wellcome Trust Clinical Research Centre<br/> Gondwe, Ebbie; Malawi-Liverpool-Wellcome Trust Clinical Research Centre<br/> Hlupeni, Admire; University of Zimbabwe College of Health Sciences<br/> Hosseinipour, Mina C.; Kamuzu Cent Hosp<br/> Kanyama, Cecilia; Lilongwe Medical Relief Trust (UNC) Project<br/> Meya, David; Makerere University<br/> Mosepele, Mosepele; Botswana-Harvard AIDS Institute Partnership<br/> Muthoga, Charles; Botswana-Harvard AIDS Institute Partnership<br/> Muzoora, Conrad; Makerere University<br/> Mwandumba, Henry; Liverpool School of Tropical Medicine; Malawi Liverpool Wellcome Trust Clinical Research Programme<br/> Ndholvu, Chiratidzo; University of Zimbabwe College of Health Sciences<br/> Rajasingham, Radha; University of Minnesota<br/> sayed, sumaya; Institute of Infectious Diseases and Molecular Medicine<br/> Shamu, Shepherd; University of Zimbabwe College of Health Sciences<br/> Tsholo, Katlego; Botswana-Harvard AIDS Institute Partnership<br/> Tugume, Lillian ; Makerere University<br/> Williams, Darlisha; Makerere University<br/> Maheswaran, Hendramoorthy; University of Warwick Warwick Medical School<br/> Shiri, Tinevimbo; Liverpool School of Tropical Medicine<br/> BOYER-CHAMMARD, Timothée; Institut Pasteur<br/> Loyse, Angela; St George's University of London</p> |

|                                                    |                                                                                                                                                                                                                                                                                                                                                                                                                                                                                                                                                                                                                                                                           |
|----------------------------------------------------|---------------------------------------------------------------------------------------------------------------------------------------------------------------------------------------------------------------------------------------------------------------------------------------------------------------------------------------------------------------------------------------------------------------------------------------------------------------------------------------------------------------------------------------------------------------------------------------------------------------------------------------------------------------------------|
|                                                    | Chen, T; Liverpool School of Tropical Medicine, Department of Clinical Sciences<br>Wang, Duolao; Liverpool School of Tropical Medicine<br>Lalloo, David; Malawi Liverpool Wellcome Trust Clinical Research Centre; Liverpool School of Tropical Medicine<br>Meintjes, Graeme; University of Cape Town, Medicine<br>Jaffar, Shabbar; Liverpool School of Tropical Medicine<br>Harrison, Thomas; St George's University of London<br>Jarvis, Joseph; Botswana-Harvard AIDS Institute Partnership; London School of Hygiene and Tropical Medicine<br>Niessen, Louis; Liverpool School of Tropical Medicine, Health Economics; University of Warwick, Dept of Health Sciences |
| <b>&lt;b&gt;Primary Subject Heading&lt;/b&gt;:</b> | Infectious diseases                                                                                                                                                                                                                                                                                                                                                                                                                                                                                                                                                                                                                                                       |
| <b>Secondary Subject Heading:</b>                  | Health economics, HIV/AIDS, Pharmacology and therapeutics                                                                                                                                                                                                                                                                                                                                                                                                                                                                                                                                                                                                                 |
| <b>Keywords:</b>                                   | HEALTH ECONOMICS, HIV & AIDS < INFECTIOUS DISEASES, Tropical medicine < INFECTIOUS DISEASES, Clinical trials < THERAPEUTICS, cryptococcal meningitis                                                                                                                                                                                                                                                                                                                                                                                                                                                                                                                      |
|                                                    |                                                                                                                                                                                                                                                                                                                                                                                                                                                                                                                                                                                                                                                                           |

SCHOLARONE™  
Manuscripts



1  
2  
3 **AMBIsome Therapy Induction Optimisation (AMBITION): High dose Ambisome for Cryptococcal**  
4 **Meningitis Induction Therapy in sub-Saharan Africa: Economic Evaluation Protocol for a**  
5 **Randomised Controlled Trial Based Equivalence Study.**  
6  
7  
8  
9  
10  
11

12 Ponego Ponatshego (pponatshego@bhp.org.bw)<sup>1\*</sup>

13  
14 David S Lawrence (david.s.lawrence@lshtm.ac.uk)<sup>1,2†\*</sup>,

15  
16 Nabila Youssouf (nabila.youssouf@lshtm.ac.uk)<sup>1,2</sup>,

17  
18 Síle F. Molloy (smolloy@sgul.ac.uk)<sup>3</sup>,

19  
20 Melanie Alufandika (malufandika@mlw.mw)<sup>4</sup>,

21  
22 Funeka Bango (funeka.bango@hiv-research.org.za)<sup>5</sup>,

23  
24 David R. Boulware (boulw001@umn.edu)<sup>6,7</sup>,

25  
26 Chimwemwe Chawinga (cchawinga@unclilongwe.org)<sup>8</sup>,

27  
28 Eltas Dziwani (eltas.nyirenda@live.com)<sup>4</sup>,

29  
30 Ebbie Gondwe (egondwe@mlw.mw)<sup>4</sup>,

31  
32 Admire Hlupeni (ahlupeni@gmail.com)<sup>9</sup>,

33  
34 Mina C. Hosseinipour (mina\_hosseinipour@med.unc.edu)<sup>8</sup>,

35  
36 Cecilia Kanyama (ckanyama@gmail.com)<sup>8</sup>,

37  
38 David B. Meya (david.meya@gmail.com)<sup>6</sup>,

39  
40 Mosepele Mosepele (mosepele.mosepele@gmail.com)<sup>1</sup>,

41  
42 Charles Muthoga (chmuthoaga@gmail.com)<sup>1</sup>,

43  
44 Conrad Muzoora (conradmuzoora@yahoo.com)<sup>6</sup>,

45  
46 Henry C. Mwandumba (henry.mwandumba@lstmed.ac.uk)<sup>4,10</sup>,

47  
48 Chiratidzo E. Ndhlovu (mascen@mweb.co.zw)<sup>9</sup>,

49  
50 Radha Rajasingham (radha@umn.edu)<sup>6</sup>,

1  
2  
3 Sumaya Sayed (sumaya.sayed@uct.ac.za)<sup>5</sup>,  
4  
5  
6 Shepherd Shamu (shamushe@yahoo.com)<sup>9</sup>,  
7  
8 Katlego Tsholo (katlego.tsholo@yahoo.ie)<sup>1</sup>,  
9  
10  
11 Lillian Tugume (lilliqntugume18@gmail.com)<sup>6</sup>,  
12  
13  
14 Darlisha Williams (darlisha@gmail.com)<sup>6</sup>,  
15  
16 Hendramoorthy Maheswaran (H.Maheswaran@warwick.ac.uk)<sup>11</sup>,  
17  
18  
19 Tinevimbo Shiri (tinevimbo.shiri@lstmed.ac.uk)<sup>10</sup>,  
20  
21  
22  
23  
24  
25  
26  
27  
28  
29  
30  
31  
32  
33  
34  
35  
36  
37  
38  
39  
40  
41  
42  
43  
44  
45  
46  
47  
48  
49  
50  
51  
52  
53  
54  
55  
56  
57  
58  
59  
60

Timothée Boyer-Chammard (timothee.boyer-chammard@pasteur.fr)<sup>12</sup>,  
Angela Loyse (aloyse@sgul.ac.uk)<sup>3</sup>,  
Tao Chen (tao.chen@lstmed.ac.uk)<sup>10</sup>,  
Duolao Wang (doulao.wang@lstmed.ac.uk)<sup>10</sup>,  
David G Laloo (david.laloo@lstmed.ac.uk)<sup>4,10</sup>,  
Graeme Meintjes (graemein@mweb.co.za)<sup>5</sup>,  
Shabbar Jaffar (shabbar.jaffar@lstmed.ac.uk)<sup>10</sup>,  
Thomas S Harrison (tharriso@sgul.ac.uk)<sup>3</sup>,  
Joseph N Jarvis (joseph.jarvis@lshtm.ac.uk)<sup>1,2\*</sup> and  
Louis Niessen (louis.niessen@lstmed.ac.uk)<sup>10\*</sup>

1. Botswana-Harvard AIDS Institute Partnership, Gaborone, Botswana
2. Department of Clinical Research, Faculty of Infectious and Tropical Diseases, London School of Hygiene and Tropical Medicine, London, UK
3. Research Centre for Infection and Immunity, St George's University of London, London, UK
4. Malawi-Liverpool-Wellcome Trust Clinical Research Centre, Blantyre, Malawi
5. Institute of Infectious Diseases and Molecular Medicine, University of Cape Town, Cape Town,

1  
2  
3 South Africa  
4

- 5 6. Infectious Diseases Institute, Makerere University, Kampala, Uganda  
6  
7 7. Department of Medicine, University of Minnesota, Minneapolis, MN, USA  
8  
9 8. Lilongwe Medical Relief Trust (UNC Project), Lilongwe, Malawi  
10  
11 9. Department of Medicine, University of Zimbabwe College of Health Sciences, Parirenyatwa  
12 Hospital, Harare, Zimbabwe  
13  
14 10. Department of Clinical Sciences and International Public Health, Liverpool School of Tropical  
15 Medicine, Liverpool, UK  
16  
17 11. Population Evidence and Technologies, University of Warwick, Coventry, UK  
18  
19 12. Molecular Mycology Unit and National Reference Centre for Invasive Mycoses, Institut Pasteur,  
20 Paris, France  
21  
22  
23  
24  
25

26  
27 † Corresponding author: david.s.lawrence@lshtm.ac.uk +267 7652 4122  
28

29 \*Equal contribution  
30  
31  
32  
33  
34

35  
36  
37  
38  
39  
40  
41  
42  
43  
44  
45  
46  
47  
48  
49  
50  
51  
52  
53  
54  
55  
56  
57  
58  
59  
60

**Word count: 4050**

**ABSTRACT**

**Introduction:** Cryptococcal meningitis is responsible for around 15% of all HIV-related deaths globally. Conventional treatment courses with amphotericin-B require prolonged hospitalisation and are associated with multiple toxicities and poor outcomes. A phase II study has shown that a single high-dose of liposomal amphotericin may be comparable to standard treatment. We propose a phase III clinical endpoint trial comparing single, high-dose liposomal amphotericin with the WHO recommended first line treatment at six sites across five countries. An economic analysis is essential to support wide-scale implementation.

**Methods and Analysis:** Country-specific economic evaluation tools will be developed across the five country settings. Details of patient and household out of pocket expenses and any catastrophic healthcare expenditure incurred will be collected via interviews from trial patients. Health service patient costs and related household expenditure in both arms will be compared over the trial period in a probabilistic approach, using Monte Carlo bootstrapping methods. Costing information and number of life years survived will be used as the input to a decision-analytic model to assess the cost-effectiveness of a single, high-dose liposomal amphotericin to the standard treatment. In addition, these results will be compared to a historical cohort from another clinical trial.

**Ethics and Dissemination:** The AMBITION trial has been evaluated and approved by the London School of Hygiene and Tropical Medicine, University of Botswana, Malawi National Health Sciences, University of Cape Town, Mulago Hospital and Zimbabwe Medical Research Council research ethics committees. All participants will provide written informed consent or if lacking capacity will have consent provided by a proxy. The findings of this economic analysis, part of the AMBITION trial, will be disseminated through peer-reviewed publications and at international and country-level policy meetings.

**Trial Registration:** ISRCTN: 7250 9687 Date of Registration: 13/07/2017

### STRENGTHS AND LIMITATIONS OF THIS STUDY

- This economic analysis will provide evidence to inform policy decisions about the use of a more expensive medication in cryptococcal meningitis.
- This analysis will provide data that may justify initiatives to increase the availability of a more expensive medication in cryptococcal meningitis
- This approach will enable the development and application of country-level costing tools across five African country settings which can be re-utilised for future studies and contribute to capacity building in the region.
- The study is taking place at six large referral hospitals across five countries in East and Southern Africa and the results might not be representative or generalisable to remote rural areas or settings in other countries.

## INTRODUCTION

Cryptococcal Meningitis (CM) is a severe fungal infection of the brain which occurs in advanced HIV infection. It is estimated that there are roughly 220,000 cases of CM globally per year with 73% of these occurring in sub-Saharan Africa. Annual global deaths are estimated at 181,000 and CM is responsible for approximately 15% of all AIDS-related deaths(1).

The current recommended first line treatment for CM is amphotericin B deoxycholate (AmBd). AmBd is associated with multiple drug-induced toxicities including anaemia, impaired renal function, electrolyte abnormalities and infusion related reactions which make it unsafe to administer in high doses. AmBd is also difficult to administer, requiring hospitalization for 7 to 14 days of intravenous infusions, depending on which oral antifungal it has been paired with. In addition, treatment outcomes are poor with acute mortality at 10-weeks ranging from 30-55%(2). The use of a liposomal form of amphotericin called Ambisome (hereafter referred to as L-AmB) is associated with reduced drug induced-toxicities when compared to conventional AmBd(3). The long tissue half-life and effective penetration into the brain tissue of L-AmB has prompted research into the effectiveness of treatment with short courses of high-dose L-AmB(4). The AMBisome Therapy Induction Optimisation (AMBITION) phase II clinical trial conducted in Botswana and Tanzania found that a single, high-dose of 10mg/kg L-AmB was well tolerated and led to a non-inferior reduction in fungal burden in cerebrospinal fluid when compared to standard 14-day courses of 3mg/kg L- AmB(5). This dosing strategy is now being taken to a clinical endpoint trial.

The phase III AMBITION trial is a phase III open label randomised control non-inferiority trial to compare single, high-dose L-AmB treatment to the WHO first-line recommended regimen of a 7-day course of AmBd based treatment in avoiding all-cause mortality in HIV-associated CM (Figure 1)(6, 7). Eligible patients will be randomised to receive either:

1. L-AmB 10 mg/kg day 1 given with 14-days of fluconazole 1200mg/day and flucytosine 100mg/kg/day

1  
2  
3 (single dose) or  
4

- 5 2. Amphotericin B deoxycholate 1 mg/kg/d for 7-days given with 7-days of flucytosine 100mg/kg/day  
6 followed by 7-days of fluconazole 1200mg/day (control arm).  
7  
8  
9

10  
11 After the 2-week induction phase all patients will receive fluconazole 800 mg/day to 10 weeks and  
12 200 mg/day thereafter. ART will be commenced 4 to 6 weeks after initiation of antifungal therapy.  
13  
14 The trial will enroll 850 patients across six sites in five countries in Africa: Gaborone, Botswana (90);  
15 Blantyre (230) and Lilongwe (110), Malawi; Cape Town, South Africa (80); Kampala, Uganda (110)  
16 and Harare, Zimbabwe (230). All participants will be invited to take part in the economic evaluation  
17 study.  
18  
19  
20  
21  
22  
23  
24

25  
26 The use of L-AmB has potential implications for both clinical outcomes and healthcare costs. The  
27 widespread availability of L-AmB has previously been limited by the high cost of therapy: currently  
28 the internationally listed price is \$85 per 50mg vial compared to \$8 per 50mg vial of AmBd. The  
29 listed cost per patient of the medication for the single dose arm in this trial will be \$996 versus \$132  
30 for the control arm. However, the impact of a potentially more clinically effective intervention that is  
31 associated with fewer drug-induced toxicities and a reduced length of hospital stay may offset this  
32 expense. An argument for widening access to L-AmB has been strengthened since, in September  
33 2018, Gilead announced as part of the expanded access preferential pricing programme for visceral  
34 leishmaniasis to include cryptococcal meningitis. While the normal cost in other countries varies  
35 from US\$80 to US\$400, the drug will now be available for US\$16.25 in 116 low and middle-income  
36 countries(8). This could have a dramatic impact on mortality(9).  
37  
38  
39  
40  
41  
42  
43  
44  
45  
46  
47  
48  
49  
50

51  
52 We plan an economic analysis to estimate the cost consequences and the cost-effectiveness of  
53 short-course L-AmB treatment, compared to the control arm, in five individual country settings  
54 across sub-Saharan Africa. The findings will also be compared to a historical cohort from the recently  
55 completed Advancing Cryptococcal Meningitis Treatment for Africa (ACTA) trial. The ACTA trial  
56  
57  
58  
59  
60

1  
2  
3 recruited patients in Cameroon, Malawi, Tanzania and Zambia and compared treatment outcomes  
4  
5 among individuals receiving one of five different treatment regimens, including the control arm used  
6  
7 in the AMBITION trial(10). The purpose of this comparison is to identify any change in costs over  
8  
9 time, any gross variation in health service costs between the AMBITION and ACTA cohorts, and to  
10  
11 enable comparison of the cost-effectiveness of the short course L-AmB with the other regimens  
12  
13 tested in ACTA(11).  
14  
15

16  
17  
18 The hypotheses are that the short course treatment:

- 19  
20  
21 1. Will show a zero-net societal cost change or that there will be societal cost savings from the short L-  
22  
23 AmB treatment and an equivalent or increased effectiveness of the treatment reducing mortality  
24  
25 over a patient life time.  
26  
27 2. Will be cost-effective in terms of life years saved over a patient lifetime when compared to historical  
28  
29 cohorts who received different combination treatment regimens in a recently completed clinical  
30  
31 trial.  
32  
33  
34

35 These analyses will aim to provide the economic evidence to support wide-scale implementation of  
36  
37 short-course L-AmB treatment across sub-Saharan settings.  
38  
39  
40

#### 41 **OBJECTIVES:**

42  
43 The main objective of the economic analysis is to assess the cost-effectiveness of single, high-dose L-  
44  
45 AmB compared to the control arm treatment regimen for HIV associated CM across the five country  
46  
47 settings in six sites.  
48  
49  
50

#### 51 **Secondary Objectives:**

- 52  
53  
54 • To assess the cost-consequences from the societal and health service perspective of single, high-  
55  
56 dose L-AmB compared to the control arm across the five country settings.  
57  
58 • To assess the total health service costs per patient at each country site.  
59  
60



- To assess out-of-pocket expenses incurred by patients and households at all trial sites.
- To assess the percentage of catastrophic household expenditure experienced by patients at each trial site.
- To compare the total societal costs per patient and cost-effectiveness of a single, high-dose L-Amb with historical cohorts that received different treatment regimens within the ACTA trial.

## **METHODS AND ANALYSIS**

### **Study Design**

The study is a prospective economic evaluation from the societal perspective – including both health service and patient related perspectives - comparing the costs and effectiveness of the two interventions at each of the six trial sites across the five country settings. The two key components of this study are the collection of data concerning personal expenditure on health and the development of country costing tools, which will be applied to data concerning health-service costs collected within the trial.

### **Household expenditure**

To estimate the societal costs at the patient and household level, they or their representatives will be interviewed at two points in time: within the first five days of randomisation and at their final face-to-face follow-up at week 10. The questionnaires, based on those used in the ACTA trial and further developed for this study, are designed to estimate their personal healthcare expenditure in the four weeks leading up to enrolment and during the trial. A summary of the questions included in the questionnaire are presented in Table 1. In addition, the out-of-pocket health care expenditure by the individual and their household, loss of income incurred due to illness, and loss of labour time of the patients themselves and their carers will be collected using methods adopted in trials of a similar nature(12).

**Table 1: Structure of the health economics questionnaire for the AMBITION study.**

- Personal health expenditure including on consultations, medication, travel time and costs
- Relative and/or household health expenditure in relation to the patient's condition
- The duration and severity of the illness episode
- Loss of productivity and time off work for both patient and relative/s
- Profession and educational attainment of patient
- Profession and educational attainment of the person who earns the highest income (if not the patient)
- Access to social security, welfare support and health insurance
- Household expenditure on food, utilities, rent and large purchases such as cars, furniture and electrical items to assess the socio-economic status of the household
- The need for temporary loans or the sale of assets to fund health care and other costs in relation to the illness episode
- The level of disability and care needs of the patient

The interview questions will preferably be asked directly to the patient. If the patient is confused or has reduced consciousness due to CM, a relative or next-of-kin may provide proxy consent for them to enroll in the trial. It is unlikely that this person will be fully aware of the patient's financial situation and in these cases, it may be necessary to wait for the patient to recover before asking them directly. In cases where patients have prolonged confusion or are felt to have a poor prognosis then these questions can be asked of the proxy. Data will be collected by study doctors and nurses and entered into the trial Electronic Data Capture (EDC) system: a uniform database to be utilised across all sites. An interview guide for those collecting data from patients will ensure that nuances and country specific idioms are acknowledged.

1  
2  
3 The above methods have been developed through an iterative process. Initially the lead Health  
4 Economist, who led on the ACTA cost-effectiveness analysis, and members of the Trial Management  
5 Group developed the data collection tools and integrated these into the wider trial EDC. This was  
6 later refined following a one-week meeting of health economists and study team members from  
7 across the AMBITION sites held in Blantyre, Malawi in November 2017. This provided the  
8 opportunity for experts working in this field and individuals who will collect data from patients to  
9 improve these tools by collecting and entering data from fabricated patients. Feedback was then  
10 integrated into both the data collection methods and the EDC and shared for final approval across  
11 the AMBITION consortium until a consensus was reached.  
12  
13  
14  
15  
16  
17  
18  
19  
20  
21  
22  
23

### 24 **Country-specific costing approaches**

25 Presently, each site has differing levels of experience with conducting economic analyses and has  
26 varied access to validated country costing tools. As stated, the preparation of the trial included a  
27 one-week workshop with at least two team members from each site to assess the face-validity and  
28 completeness of the questionnaire, to practice electronic data entry of the completed questionnaire,  
29 carrying costing computations, and to increase the knowledge and understanding of economic  
30 evaluation. In each country, resource use data will be collected using an ingredients-based approach.  
31 The data on individual resource use will be collected from all participants onto case-report forms.  
32 Overhead costs, including costs of admissions and laboratory tests, will be collated from the hospitals'  
33 financial and utilisation documents.  
34  
35  
36  
37  
38  
39  
40  
41  
42  
43  
44  
45  
46  
47

### 48 Botswana Harvard AIDS Institute Partnership (BHP): Gaborone, Botswana

49 BHP will use a micro-costing approach to estimate CM treatment in Botswana from a single health  
50 provider's perspective, in this case, from the Ministry of Health and Wellness perspective. The total  
51 of related costs i.e. patient-specific treatment cost and 'hotel costs' to cover CM treatment will be  
52 determined as per the 2016 Botswana HIV Treatment Guidelines(13). All costs of pharmaceuticals  
53 will be taken from the listed tender prices at the Central Medical Stores, which procure stock and  
54  
55  
56  
57  
58  
59  
60

1  
2  
3 distribute pharmaceuticals and healthcare commodities to all government healthcare facilities. This  
4 package will provide an estimate of 'patient specific' costs of uncomplicated CM. 'Hotel costs' will  
5 determine the necessary hospital, staffing, capital and infrastructure requirements as the patient is  
6 admitted over a seven-day period. Data will be obtained from Princess Marina Hospital, which is the  
7 biggest, and main referral hospital in Botswana. Staff salaries will be taken from the Government of  
8 Botswana salary scales for health professionals. By combining this treatment costing data with the  
9 meningitis burden data generated through a previously completed audit we will also generate an  
10 estimate of the total current costs to the Botswana health service of treating CM. The data will  
11 complement the 'Estimated resource needs for key health interventions offered under Botswana's  
12 Essential Health Services Plan (2013-2018)' that project the cost of all health programs, including the  
13 treatment of CM, from 2013 to 2018 and will also be used as a reference for the next version of this  
14 document to be published in 2019(14).

15  
16  
17  
18  
19  
20  
21  
22  
23  
24  
25  
26  
27  
28  
29  
30  
31 Malawi Liverpool Wellcome Trust Clinical Research Centre: Blantyre, Malawi.

32 Standardised national health costing data is not available in Malawi. An existing costing tool which  
33 was developed for a HIV testing study will be adapted(15). Patient-related health care costs will be  
34 obtained from the Central Medical Stores Trust, the only supplier mandated to supply government  
35 health facilities in Malawi. Personnel costs will be refined by referencing the Malawi government  
36 salary structures and payroll and estimating the proportion of health personnel time taken in the  
37 clinical care of the patient, as well as allowance costs for patients working out of working hours.  
38 Programme-related costs will be adapted using the results from recent costing studies within the  
39 Queen Elizabeth Central Hospital(15).

40  
41  
42  
43  
44  
45  
46  
47  
48  
49  
50  
51  
52 University of North Carolina Project: Lilongwe, Malawi.

53 Most of costing data for Lilongwe will be obtained using the same methods as that outlined above  
54 for Blantyre. In addition, local programme-related costs will be estimated and projected through a  
55 local costing study within the Kamuzu Central Hospital. This adaptation will be based on existing  
56  
57  
58  
59  
60

1  
2  
3 local costing data as part of the Driving Reduced AIDS-associated Meningo-encephalitis (DREAMM)  
4  
5 study, which will be shared with the AMBITION consortium.  
6  
7  
8

9  
10 University of Cape Town: Cape Town, South Africa.

11  
12 There are currently no costing tools for primary data collection for disease specific costing of CM  
13  
14 treatment in South Africa. A costing tool will be developed from validated disease specific costing  
15  
16 tools for the South African context(16). Costs from the health service (Department of Health)  
17  
18 perspective will be collected using the ingredients costing approach and captured in an Excel  
19  
20 spreadsheet. The quantity of resources used to treat CM in each study arm will be estimated from  
21  
22 the trial and patient records. Prices for these treatment related ingredients will be obtained from  
23  
24 the various service providers within the Department of Health that are responsible for offering the  
25  
26 products and services. Specific activities by staff will be identified and estimated through the review  
27  
28 of routinely collected time sheets. Human resource costs as well as recurrent and capital costs will  
29  
30 be allocated using hospital expenditure and financial records as well as records from the Provincial  
31  
32 Department of Health. The average cost of each treatment component will be calculated by  
33  
34 multiplying the quantity of resources used by the unit price. From this we can calculate the cost per  
35  
36 case of CM treated by multiplying the average cost by the number of times a particular cost has  
37  
38 been incurred.  
39  
40  
41  
42  
43

44 Infectious Diseases Institute: Kampala, Uganda.

45  
46 Though there is a high burden of CM in Uganda, the costs associated with treatment have not been  
47  
48 formally outlined in a costing tool. Previous research describing the costs of treatment used  
49  
50 informally gathered estimates for treatment and management of the disease based on reports from  
51  
52 various sources including local pharmacies, laboratories and the Ugandan Ministry of Health(17).  
53  
54 The Uganda team will create a systematic costing tool for CM. This tool will consider the costs of  
55  
56 treatment as well as the costs borne by the patients being treated. The creation of this tool will  
57  
58 involve input from the Ministry of Health as well as the major suppliers of medications. We will  
59  
60

1  
2  
3 engage these organizations and other key stakeholders to ascertain the current costs of meningitis  
4 treatment and develop a costing tool which can be adjusted in the future should costs change.  
5  
6  
7  
8  
9

10 University of Zimbabwe School of Health Sciences: Harare, Zimbabwe.

11 Clinical cost data will be collected alongside the clinical trial using micro-costing methodologies. The  
12 economic evaluation will be done from the societal perspective to enable the study to assess the  
13 overall household economic impact of CM and will enable us to determine the patient and provider  
14 unit costs. This study is powered enough to detect both country specific clinical and economic  
15 differences. Direct patient level clinical activity data such as drugs, staff time, diagnostics, pathology  
16 and radiology will be collected alongside the trial and relevant unit costs determined using the study  
17 protocol. In other cases, prices for drugs, diagnostic and radiology tests will be collected from the  
18 National Pharmaceutical Company of Zimbabwe, national reference diagnostic and radiology  
19 laboratories, and from consultations with experts. Indirect and overhead costs such as management  
20 and administration costs, utilities and other capital costs for in-patient days will be determined using  
21 data from Parirenyatwa Hospital, Harare financial records, the WHO Choice Database and from  
22 previous clinical trials that took place at the proposed site(18, 19).  
23  
24  
25  
26  
27  
28  
29  
30  
31  
32  
33  
34  
35  
36  
37  
38

### 39 **Data collection and data management**

40 Data collected and validated using the EDC system will be stored in an electronic database that is  
41 protected using a scheme of authentication and encryption. Paper documents, such as clinical notes  
42 and administrative documentation will be kept in a secure location and held for 5 years after the end  
43 of the trial. During this period, all data should be accessible to the competent or equivalent  
44 authorities, the Sponsor and other relevant parties with suitable notice. Security of electronic  
45 records and data is a significant concern. All components of the distributed data systems will use  
46 authentication and encryption to render subject identity and personal health information unusable,  
47 unreadable, or indecipherable to unauthorized individuals. Full Drive Encryption will be  
48 implemented at the hardware layer of all devices storing protected health information. A three-  
49 factor scheme will be used to authenticate users through the hardware layer to the application layer  
50  
51  
52  
53  
54  
55  
56  
57  
58  
59  
60

1  
2  
3 where personal health information is available. The applications will have user profiles to control  
4 access to certain data and reports. The application and database layers will use a combination of  
5 hashing and encryption for sensitive and personal data. Mobile devices and the staff operating them  
6  
7 will not be equipped with the encryption keys to decrypt selected sensitive data fields.  
8  
9  
10

### 11 12 13 14 **Confidentiality**

15  
16 The trial will be conducted in compliance with the approved protocol, the Declaration of Helsinki  
17 2008, the principles of Good Clinical Practice and applicable national regulations. We plan to follow  
18 the principles of the UK Data Protection Act (DPA) regardless of the countries where the trial is  
19 being conducted. Consent forms will be stored under the supervision of each local primary  
20 investigator in a secured office and accessible to trial staff only. The database will not hold personal  
21 details as participants are identified by their study number throughout the trial.  
22  
23  
24  
25  
26  
27  
28  
29  
30

### 31 **Data analysis**

32  
33 As outlined above, information on resource use and number of units used will be collected at  
34 patient-level through the EDC, as part of the trial, and through additional separate country  
35 costing studies. To validate and refine the data collection process, an early analysis will take place  
36 at each site after ten patients have completed the ten-week study follow-up period.  
37  
38  
39  
40  
41  
42  
43

44 Upon closure of the study full data analysis will commence. Firstly, an empirical cost-consequence  
45 analysis will take place, using empirical individual patient data on societal resource use and unit cost  
46 based on the results from the costing studies(20). Both societal and health care perspectives are  
47 chosen, and health service patient costs including household costs, treatment cost and  
48 hospitalisations in both arms will be compared over the trial period in a probabilistic approach, using  
49 Monte Carlo bootstrapping methods. To handle the heterogeneity of the trial population in within  
50 trial evaluation, we will derive a benefit value for each patient from the observed costs and effects  
51 and then construct a regression model with treatment variable and collected explanatory variables.  
52  
53  
54  
55  
56  
57  
58  
59  
60

1  
2  
3 Next, the costing information and number of life years' survival will be used in a decision-analytic  
4 model to assess the cost-effectiveness of the single, high-dose arm against the control arm and also  
5 against other combination treatment regimens from the ACTA trial. A Markov model has been chosen  
6 as it allows to explicitly account for passage of time to calculate time dependent costs and life years of  
7 the remaining life span. Results will be presented using incremental cost-effectiveness ratios and  
8 cost-effectiveness acceptability curves generated by Monte Carlo bootstrapping methods. This  
9 approach avoids the stochastic fallacy and will determine if a single, high-dose L-AmB will be as or  
10 even more cost-effective compared to the current WHO recommended first-line treatment. An  
11 existing model will be adapted based on Jarvis et al., using the treatment sub-model (Figure 2)(21).  
12 The Markov model has a monthly cycle length, running the model for 12 cycles to calculate annual  
13 costs and annual life years. We will supplement the model to be able to extrapolate data beyond the  
14 period of observed follow-up. The Markov modelling framework also allows for the synthesis of data  
15 from secondary sources, like mortality risk from other causes and excess mortality risks(17). It also  
16 allows for probabilistic sensitivity analyses. We are going to use non-parametric bootstrapping to  
17 assess uncertainties, and both deterministic and probabilistic sensitivity analyses to examine the impact  
18 of all relevant parameters on the incremental cost-effectiveness ratio. The other country teams will be  
19 able to use an adapted model to enter their country specific data and costing information as well as  
20 estimated survival figures, while using the pooled effectiveness information. In this way, each  
21 country will arrive at valid country-specific economic estimates.

22  
23  
24  
25  
26  
27  
28  
29  
30  
31  
32  
33  
34  
35  
36  
37  
38  
39  
40  
41  
42  
43  
44  
45  
46 We will follow the CHEERS appraisal guidelines on economic evaluation(22). As our study is an  
47 equivalence study using empirical data in a model-based analysis these guidelines we will also  
48 include good modelling practice approaches(23).  
49  
50  
51

52  
53  
54 We anticipate the development of five different country-specific costing tools for CM which can be  
55 used to compose two five-country manuscripts concerning the cost-consequence of CM across sites  
56 as well as the cost-effectiveness of the intervention across sites. In addition, individual country-level  
57  
58  
59  
60



1  
2  
3 publications will be allowed, using the whole five-country trial data base, complemented with local  
4  
5 more detailed country-level costing studies.  
6  
7  
8

9  
10 We intend to use these findings to provide an economic argument for the adoption of single, high-  
11  
12 dose L-AmB in low and middle-income countries and to help influence guidelines and policy. Another  
13  
14 important component of this study is capacity building across the African sites through the delivery  
15  
16 of a health economics course and the ongoing mentoring of individuals and teams at each of the  
17  
18 sites.  
19

### 20 21 22 **Patient and Public Involvement**

23  
24 For the primary AMBITION clinical trial, a number of the sites have well developed community  
25  
26 groups and are experienced in engaging local communities when undertaking such studies. These  
27  
28 groups were consulted prior to trial implementation, and they will be consulted regularly during trial  
29  
30 conduct. To engage the wider community, we will work with community groups, HIV patient groups  
31  
32 and local Ministries of Health to provide information about the trial, disseminate the results, and to  
33  
34 develop health education materials aimed at dispelling the current beliefs around meningitis, and  
35  
36 encouraging early care-seeking.  
37  
38  
39  
40  
41

### 42 **ETHICS AND DISSEMINATION**

43  
44 The Research Ethics Committee of the London School of Hygiene and Tropical Medicine have  
45  
46 approved the AMBITION trial protocol v2.1 07.11.17 which outlines this economic analysis (Ref  
47  
48 14355). Approval has also been granted by the following: University of Botswana Office of Research  
49  
50 and Development (UBR/RES/IRB/BIO/042), Botswana Ministry of Health and Wellness Health  
51  
52 Research and Development Division (HPDME: 13/18/1), Princess Marina Hospital Research and  
53  
54 Ethics Committee (PMH 5/79(407-1-2017), University of Cape Town Human Research Ethics  
55  
56 Committee (642/2017), Malawi National Health Sciences Research Committee (1907), Mulago  
57  
58 Hospital Research and Ethics Committee (MHREC 1297) and the Medical Research Council of  
59  
60

1  
2  
3 Zimbabwe (MRCZ/A/2263). Any amendments will be submitted and approved by each ethics  
4 committee. All participants will provide written informed consent or if lacking capacity will have  
5 consent provided by a proxy. The findings of this economic analysis, which is embedded into the  
6 AMBITION trial, will be disseminated through peer-reviewed publications and at international and  
7 country-level policy meetings.  
8  
9  
10  
11  
12

## 13 14 15 16 **DISCUSSION AND CONCLUSION**

17  
18 This phase III clinical endpoint trial comparing single, high-dose liposomal amphotericin to the  
19 control arm treatment at six sites across five counties will provide valuable information on the  
20 comparative effectiveness with existing and other proposed strategies. This will be based on the  
21 effectiveness of simplified treatment strategies as well on the possibly increased safety. The  
22 proposed economic analysis of the equivalence trial for the Malawi situation will allow for a realistic  
23 comparison with settings where there is very limited coverage of appropriate treatment of CM in  
24 people with HIV. The estimates from other trial settings will help to document the generalizability of  
25 our findings. The economic information will be essential in the support of wide-scale  
26 implementation strategies and the formulation and testing of alternative delivery modes in all  
27 comparable sub-Saharan setting.  
28  
29  
30  
31  
32  
33  
34  
35  
36  
37  
38  
39  
40  
41

42 A clinically effective and safer treatment for CM in sub-Saharan Africa could have a dramatic impact  
43 on HIV-associated mortality in the region. This economic analysis is essential to help justify any  
44 policy change towards increasing the availability of more expensive medication if is proven to be  
45 cost-effective. This process will enable the development of country-specific costing tools across five  
46 African sites, which can be utilised for future studies and will build capacity in the region.  
47  
48  
49  
50  
51

52  
53  
54 **Authors Contributions:** PP and DSL jointly wrote the manuscript with contribution on the methodology  
55 from TS, LN, TH and JNJ. PP is a study doctor in Gaborone, Botswana. DSL is the international lead  
56 clinician for the trial and created the initial data collection tools for this sub-study. NY is the trial manager  
57  
58  
59  
60

1  
2  
3 and SFM is the trial epidemiologist and both have provided critical input into the data collection tools,  
4 electronic data capture system and this manuscript. DB, MH, CK, DM, MM, CM, HM, and CN are principal  
5 investigators at each of the sites and will oversee the development of costing tools and the collection of  
6 data at each site. MA, FB, CC, ED, EG, AH, CM, RR, SS, LT, KT and DW are all study team members or  
7 affiliated academics who attended the Ambition health economics course and are the focal individuals  
8 for the health economics study at their respective sites, as well as contributing to the refining of the data  
9 collection tools and the country specific sections of this manuscript. TC, and DW are statisticians for the  
10 study and have contributed to the database function of the electronic data capture system. TS and HM  
11 are health economists who have contributed to the development of the methodology and TS will perform  
12 the early reviews of data and the overall data analysis with DSL. TBC is an international clinical adviser  
13 and a monitor who performs data checks for the study. AL, DGL, GM and SJ provided expert input into  
14 the conceptualisation and design of both the broader study and this health economics study, particularly  
15 in terms of adopting a societal perspective. TH and JNJ conceived and designed the broader study and are  
16 the co-principal investigators. LN leads the health economics study and has provided oversight of the  
17 entire process. All authors read, critiqued and approved the final manuscript.

18  
19  
20  
21  
22  
23  
24  
25  
26  
27  
28  
29  
30  
31  
32  
33  
34  
35  
36  
37 **Funding:** The study is jointly funded through the European Developing Countries Clinical Trials  
38 Partnership (EDCTP), the Swedish International Development Cooperation Agency (SIDA), and the  
39 Wellcome Trust / Medical Research Council (UK) / UKAID Joint Global Health Trials.

40  
41  
42  
43  
44  
45  
46 **Competing Interests:** JNJ and TSH were the recipients of a Gilead Investigator Initiated Award  
47 (completed). TSH has received speaker fees from Gilead Sciences and Pfizer.

48  
49  
50  
51  
52 Figure 1. Economic Evaluation Flow Diagram: Trial Entry, Randomisation, Treatment and follow-up.

53  
54 Figure 2. Simplified Markov model structure to evaluate the CM treatment(21).

**REFERENCES**

1. Rajasingham R, Smith RM, Park BJ, Jarvis JN, Govender NP, Chiller TM, et al. Global burden of disease of HIV-associated cryptococcal meningitis: an updated analysis. *The Lancet Infectious diseases*. 2017;17(8):873-81.
2. Jarvis JN, Harrison TS. Forgotten but not gone: HIV-associated cryptococcal meningitis. *The Lancet Infectious diseases*. 2016;16(7):756-8.
3. Hamill RJ, Sobel JD, El-Sadr W, Johnson PC, Graybill JR, Javaly K, et al. Comparison of 2 doses of liposomal amphotericin B and conventional amphotericin B deoxycholate for treatment of AIDS-associated acute cryptococcal meningitis: a randomized, double-blind clinical trial of efficacy and safety. *Clinical infectious diseases : an official publication of the Infectious Diseases Society of America*. 2010;51(2):225-32.
4. Lestner J, McEntee L, Johnson A, Livermore J, Whalley S, Schwartz J, et al. Experimental Models of Short Courses of Liposomal Amphotericin B for Induction Therapy for Cryptococcal Meningitis. *Antimicrobial agents and chemotherapy*. 2017;61(6).
5. Jarvis J, Leeme T, Molefi M, Chofle AA, Bidwell G, Tsholo K, et al. Short Course High-dose Liposomal Amphotericin B for HIV-associated Cryptococcal Meningitis: A phase-II Randomized Controlled Trial. *CID*. 2018;published online June 26, 2018.
6. WHO. Guidelines for the diagnosis, prevention, and management of cryptococcal disease in HIV-infected adults, adolescents and children. Geneva: World Health Organisation; 2018 March 2018.
7. Lawrence DS, Youssouf N, Molloy S, Alanio A, Alufandika M, Boulware DR, et al. AMBIsome Therapy Induction Optimisation (AMBITION): High Dose Ambisome for Cryptococcal Meningitis Induction Therapy in sub-Saharan Africa: Study Protocol for a Phase 3 Randomised Controlled Non-Inferiority Trial. *Trials*. 2018;In Press.
8. Gilead Sciences Announces Steep Discounts for Ambisome to Treat Cryptococcal Meningitis in Low - and Middle-Income Countries [press release]. Internet, September 7th 2018 2018.
9. Lawrence DS, Boyer-Chammard T, Jarvis JN. Emerging concepts in HIV-associated cryptococcal meningitis. *Current opinion in infectious diseases*. 2019;32(1):16-23.
10. Molloy SF, Kanyama C, Heyderman RS, Loyse A, Kouanfack C, Chanda D, et al. Antifungal Combinations for Treatment of Cryptococcal Meningitis in Africa. *The New England journal of medicine*. 2018;378(11):1004-17.
11. Chen T, Lakhi S, Chanda D, Mwaba P, Molloy S, Gheorghe A, et al. ACTA Trial Team. Health care costs and deaths prevented by ACTA trial treatments for cryptococcal meningitis: A comparison between 5 induction strategies in sub Saharan Africa. 22nd International AIDS Conference; 2018; Amsterdam2018.
12. Campbell SJ, Osei-Atweneboana MY, Stothard R, Koukounari A, Cunningham L, Armoo SK, et al. The COUNTDOWN Study Protocol for Expansion of Mass Drug Administration Strategies against Schistosomiasis and Soil-Transmitted Helminthiasis in Ghana. *Trop Med Infect Dis*. 2018;3(1):10.
13. Wellness MoHa. Handbook of the Botswana 2016 Integrated HIV Clinical Care Guidelines. Gaborone, Botswana; 2016.
14. Menon V, Iyer P, Mosime W. Estimated resource needs for key health interventions offered under Botswana's Essential Health Services Plan (2013-2018). Washington, DC; 2014.
15. Maheswaran H, Petrou S, MacPherson P, Choko AT, Kumwenda F, Lalloo DG, et al. Cost and quality of life analysis of HIV self-testing and facility-based HIV testing and counselling in Blantyre, Malawi. *BMC medicine*. 2016;14:34.
16. Hendriks ME, Kundu P, Boers AC, Bolarinwa OA, Te Pas MJ, Akande TM, et al. Step-by-step guideline for disease-specific costing studies in low- and middle-income countries: a mixed methodology. *Global health action*. 2014;7:23573.
17. Rajasingham R, Rolfes MA, Birkenkamp KE, Meya DB, Boulware DR. Cryptococcal meningitis treatment strategies in resource-limited settings: a cost-effectiveness analysis. *PLoS medicine*. 2012;9(9):e1001316.

- 1  
2  
3 18. Medina Lara A, Kigozi J, Amurwon J, Muchabaiwa L, Nyanzi Wakaholi B, Mujica Mota RE, et  
4 al. Cost effectiveness analysis of clinically driven versus routine laboratory monitoring of  
5 antiretroviral therapy in Uganda and Zimbabwe. *PloS one*. 2012;7(4):e33672.  
6  
7 19. WHO. Making Choices in Health: WHO Guide to Cost-Effectiveness Analysis. Geneva: World  
8 Health Organisation; 2003.  
9 20. Span MM, TenVergert EM, van der Hilst CS, Stolk RP. Noninferiority testing in cost-  
10 minimization studies: Practical issues concerning power analysis. *International journal of technology*  
11 *assessment in health care*. 2006;22(2):261-6.  
12 21. Jarvis JN, Harrison TS, Lawn SD, Meintjes G, Wood R, Cleary S. Cost effectiveness of  
13 cryptococcal antigen screening as a strategy to prevent HIV-associated cryptococcal meningitis in  
14 South Africa. *PloS one*. 2013;8(7):e69288.  
15 22. Husereau D, Drummond M, Petrou S, Carswell C, Moher D, Greenberg D, et al. Consolidated  
16 Health Economic Evaluation Reporting Standards (CHEERS)--explanation and elaboration: a report of  
17 the ISPOR Health Economic Evaluation Publication Guidelines Good Reporting Practices Task Force.  
18 *Value in health : the journal of the International Society for Pharmacoeconomics and Outcomes*  
19 *Research*. 2013;16(2):231-50.  
20 23. Philips Z, Bojke L, Sculpher M, Claxton K, Golder S. Good practice guidelines for decision-  
21 analytic modelling in health technology assessment: a review and consolidation of quality  
22 assessment. *PharmacoEconomics*. 2006;24(4):355-71.  
23  
24  
25  
26  
27  
28  
29  
30  
31  
32  
33  
34  
35  
36  
37  
38  
39  
40  
41  
42  
43  
44  
45  
46  
47  
48  
49  
50  
51  
52  
53  
54  
55  
56  
57  
58  
59  
60

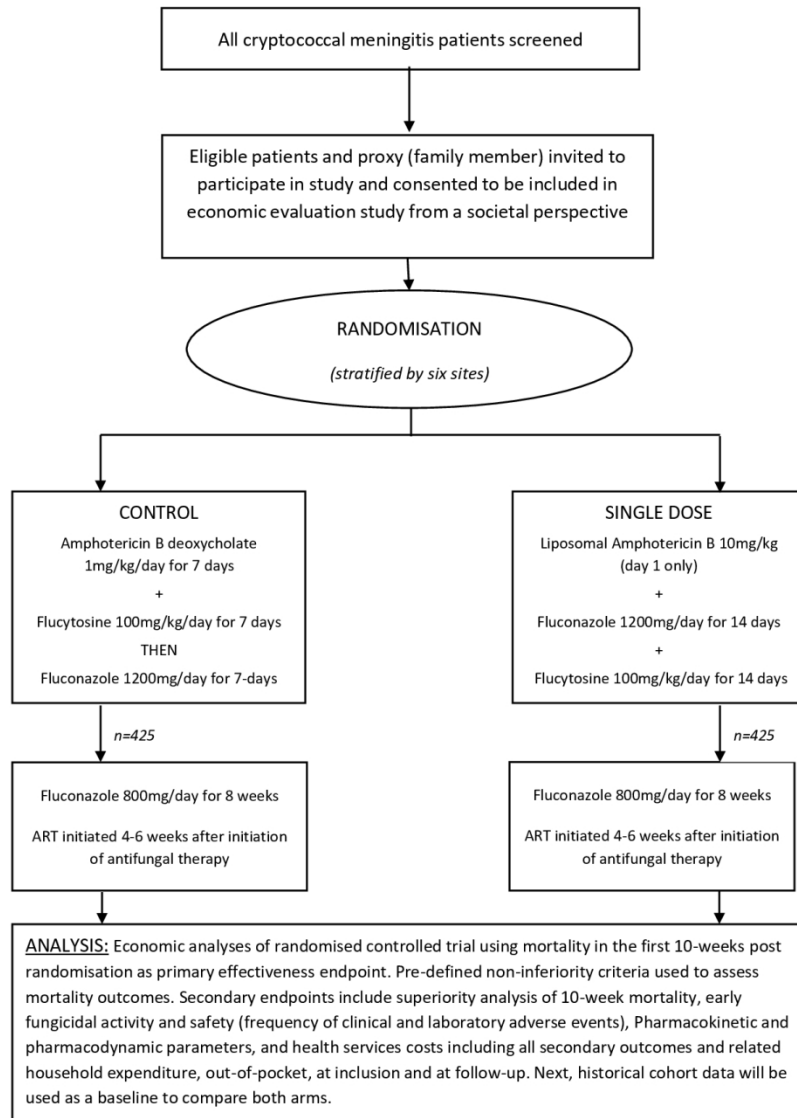

Economic Evaluation Flow Diagram: Trial Entry, Randomisation, Treatment and follow-up.

117x155mm (300 x 300 DPI)

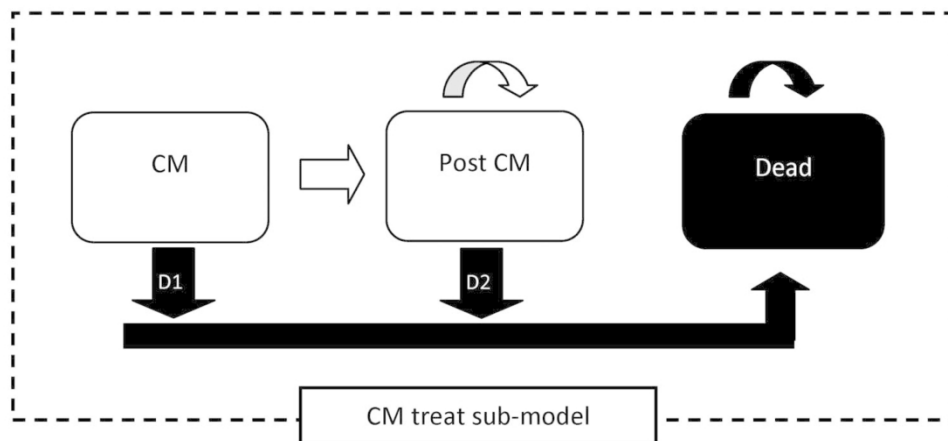

Simplified Markov model structure to evaluate the CM treatment.
